# Supplementary material for: TWAS results are complementary to and less affected by linkage disequilibrium than GWAS
Source: PubMed Central journal article supplement — Plant Physiol. 2021 Apr 6;186(4):1800–11. doi: 10.1093/plphys/kiab161 (PMC8331151; doi:10.1093/plphys/kiab161), 2021-04-06
Supplement: kiab161_supplementary_data.pdf [file kiab161_supplementary_data.pdf]

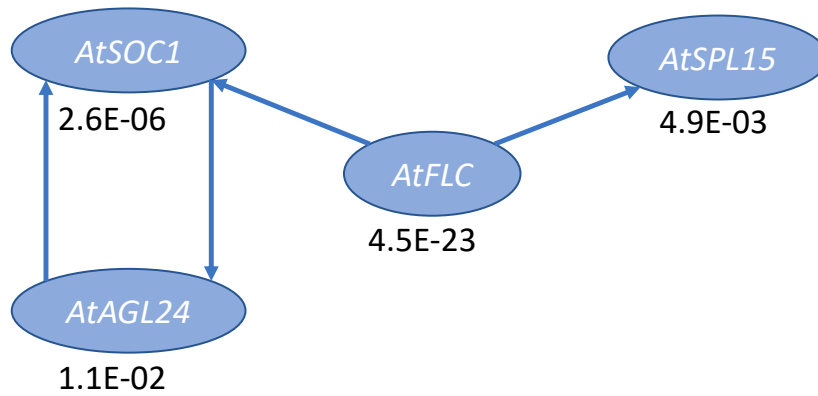

**Supplemental Figure S1.** Interaction network of four *Arabidopsis* flowering time genes. Regulatory relationships are summarized from the FLOR-ID database. Arrow directions indicate regulatory relationships. Indicated false discovery rate (FDR) values are from TWAS.

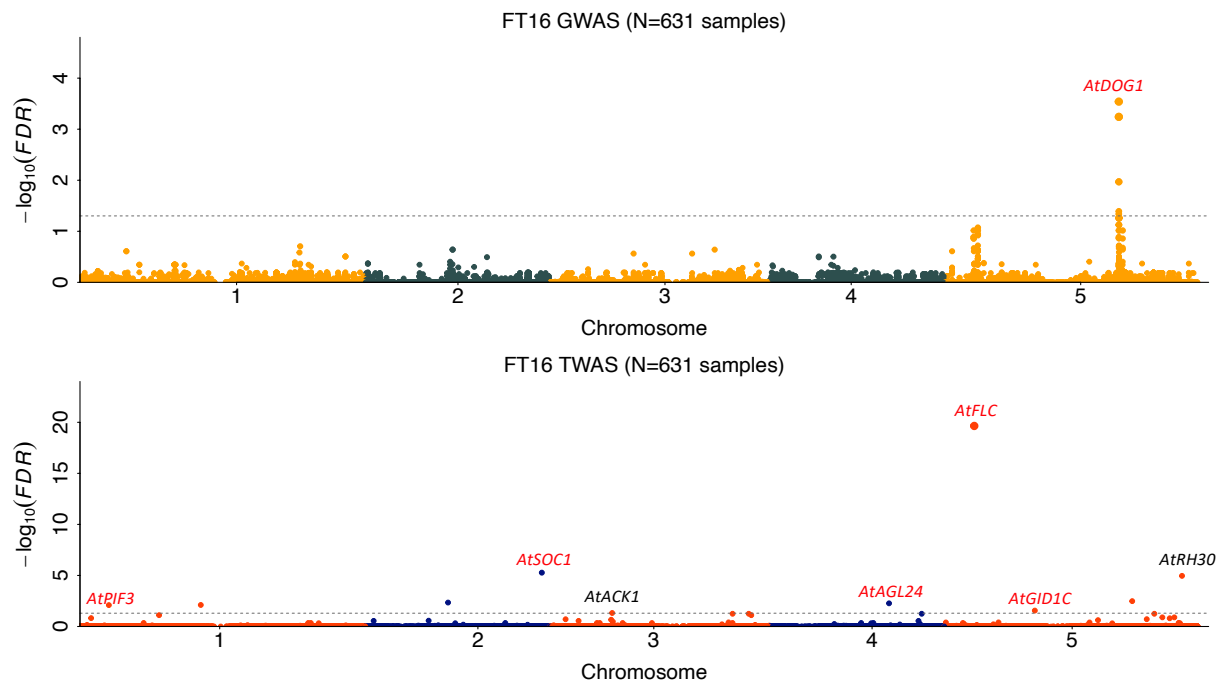

**Supplemental Figure S2.** GWAS and TWAS for *Arabidopsis* flowering time (FT16) on the subset of samples. Genotypes, expression data and phenotypes are available for all 631 samples in this subset. Manhattan plots of association studies. Each dot represents a single SNP in GWAS and a single gene in TWAS. Known trait-associated genes (in red text) and presumed trait-related genes (in black text) are indicated. Horizontal dashed lines designate the 0.05 FDR (false discovery rate) significance cutoff.

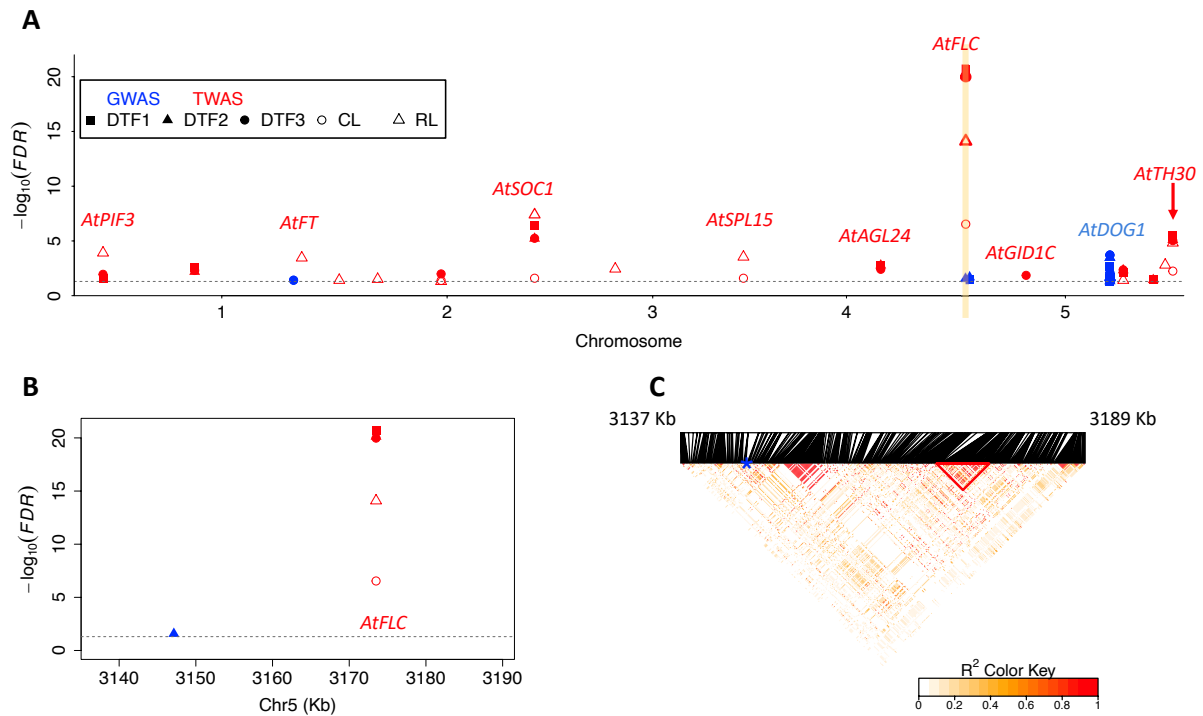

**Supplemental Figure S3.** GWAS and TWAS for five *Arabidopsis* developmental traits (three for flowering time and two for leaf number). (A), Manhattan plots of GWAS (blue) and TWAS (red) for the five traits (DTF1, days until emergence of visible flowering buds in the center of the rosette from time of sowing; DTF2, days until the inflorescence stem elongated to 1cm; DTF3, days until first open flower; CL, cauline leaf number; RL, rosette leaf number). Horizontal dashed lines designate the 0.05 FDR (false discovery rate) significance cutoff. Only associated SNPs from GWAS or genes from TWAS are shown. Genes with known relevant functions are labeled. The region surrounding the *AtFLC* gene (highlighted in yellow) from the GWAS and TWAS analyses are magnified in (B), showing that TWAS for multiple traits identified *AtFLC*, while GWAS identified only a single SNP, 26kb away, associated with RL. The LD (linkage disequilibrium) heatmap of that region (C) shows this RL associated SNP (marked in blue) is not within the same LD block as *AtFLC* (red triangle). The black lines in the box above represent SNPs and their physical position.

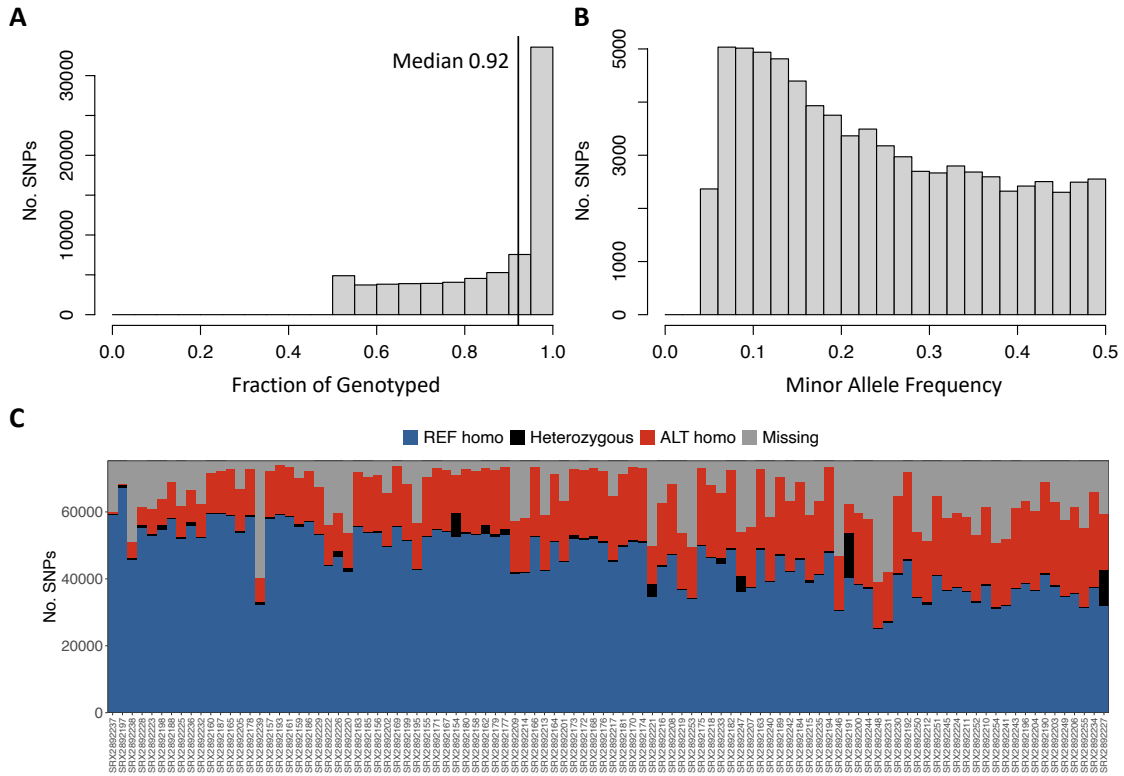

**Supplemental Figure S4.** Summary of soybean SNPs identified from leaf RNA-Seq data. (A), Fraction of 75,289 filtered SNPs that were genotyped. The x-axis indicates the fraction of samples with a sufficient number of covered reads to call a genotype; the y-axis indicates the number of SNPs. The black vertical line shows median value of 0.92; (B), Number of filtered SNPs with the indicated minor allele frequencies; (C), Distributions of genotypes in each sample, each bar represents one sample, x-axis shows soybean samples IDs. REF homo, reference homozygous allele; ALT homo, alternative homozygous allele.

**Supplemental Table S1.** Genes or loci identified via TWAS and GWAS for *Arabidopsis* flowering time and leaf number traits using data from Grimm et al., 2017.

| ID <sup>a</sup> | Chr  | Start    | End      | Symbols <sup>b</sup> | Samples | FDR <sup>c</sup> | Trait <sup>d</sup> |
|-----------------|------|----------|----------|----------------------|---------|------------------|--------------------|
| AT1G09530       | Chr1 | 3076582  | 3079539  | <i>AtPIF3</i>        | 620     | 2.44E-02         | DTF1               |
| AT1G35180       | Chr1 | 12877107 | 12878719 |                      | 620     | 2.55E-03         | DTF1               |
| AT2G45660       | Chr2 | 18807538 | 18811047 | <i>AtSOC1</i>        | 620     | 3.81E-07         | DTF1               |
| AT4G24540       | Chr4 | 12670965 | 12674072 | <i>AtAGL24</i>       | 620     | 1.74E-03         | DTF1               |
| AT5G10140       | Chr5 | 3173497  | 3179448  | <i>AtFLC</i>         | 620     | 1.98E-21         | DTF1               |
| AT5G49360       | Chr5 | 20011879 | 20016742 |                      | 620     | 7.57E-03         | DTF1               |
| AT5G57340       | Chr5 | 23226086 | 23229282 |                      | 620     | 3.12E-02         | DTF1               |
| AT5G63120       | Chr5 | 25318752 | 25322265 | <i>AtRH30</i>        | 620     | 3.15E-06         | DTF1               |
| AT1G35180       | Chr1 | 12877107 | 12878719 |                      | 618     | 6.45E-03         | DTF2               |
| AT2G45660       | Chr2 | 18807538 | 18811047 | <i>AtSOC1</i>        | 618     | 6.06E-06         | DTF2               |
| AT4G24540       | Chr4 | 12670965 | 12674072 | <i>AtAGL24</i>       | 618     | 1.70E-03         | DTF2               |
| AT5G10140       | Chr5 | 3173497  | 3179448  | <i>AtFLC</i>         | 618     | 7.53E-21         | DTF2               |
| AT5G49360       | Chr5 | 20011879 | 20016742 |                      | 618     | 4.66E-03         | DTF2               |
| AT5G57340       | Chr5 | 23226086 | 23229282 |                      | 618     | 3.62E-02         | DTF2               |
| AT5G63120       | Chr5 | 25318752 | 25322265 | <i>AtRH30</i>        | 618     | 7.93E-06         | DTF2               |
| AT1G09530       | Chr1 | 3076582  | 3079539  | <i>AtPIF3</i>        | 613     | 1.12E-02         | DTF3               |
| AT1G35180       | Chr1 | 12877107 | 12878719 |                      | 613     | 5.00E-03         | DTF3               |
| AT2G20440       | Chr2 | 8810739  | 8813644  |                      | 613     | 1.02E-02         | DTF3               |
| AT2G45660       | Chr2 | 18807538 | 18811047 | <i>AtSOC1</i>        | 613     | 5.75E-06         | DTF3               |
| AT4G24540       | Chr4 | 12670965 | 12674072 | <i>AtAGL24</i>       | 613     | 3.92E-03         | DTF3               |
| AT5G10140       | Chr5 | 3173497  | 3179448  | <i>AtFLC</i>         | 613     | 1.05E-20         | DTF3               |
| AT5G27320       | Chr5 | 9629087  | 9631210  | <i>AtGID1C</i>       | 613     | 1.39E-02         | DTF3               |
| AT5G49360       | Chr5 | 20011879 | 20016742 |                      | 613     | 4.35E-03         | DTF3               |
| AT5G63120       | Chr5 | 25318752 | 25322265 | <i>AtRH30</i>        | 613     | 9.40E-06         | DTF3               |
| AT2G20440       | Chr2 | 8810739  | 8813644  |                      | 604     | 4.08E-02         | CL                 |
| AT2G45660       | Chr2 | 18807538 | 18811047 | <i>AtSOC1</i>        | 604     | 2.54E-02         | CL                 |
| AT3G57920       | Chr3 | 21444321 | 21446035 | <i>AtSPL15</i>       | 604     | 2.54E-02         | CL                 |
| AT5G10140       | Chr5 | 3173497  | 3179448  | <i>AtFLC</i>         | 604     | 2.90E-07         | CL                 |
| AT5G63120       | Chr5 | 25318752 | 25322265 | <i>AtRH30</i>        | 604     | 5.69E-03         | CL                 |
| AT1G09530       | Chr1 | 3076582  | 3079539  | <i>AtPIF3</i>        | 574     | 1.23E-04         | RL                 |
| AT1G65480       | Chr1 | 24331428 | 24333934 | <i>AtFT</i>          | 574     | 3.51E-04         | RL                 |
| AT1G75490       | Chr1 | 28335502 | 28336706 |                      | 574     | 3.86E-02         | RL                 |
| AT2G05520       | Chr2 | 2026162  | 2027117  |                      | 574     | 3.15E-02         | RL                 |
| AT2G20440       | Chr2 | 8810739  | 8813644  |                      | 574     | 4.89E-02         | RL                 |
| AT2G45660       | Chr2 | 18807538 | 18811047 | <i>AtSOC1</i>        | 574     | 4.03E-08         | RL                 |
| AT3G21950       | Chr3 | 7734396  | 7736394  |                      | 574     | 3.59E-03         | RL                 |
| AT3G57920       | Chr3 | 21444321 | 21446035 | <i>AtSPL15</i>       | 574     | 2.91E-04         | RL                 |
| AT5G10140       | Chr5 | 3173497  | 3179448  | <i>AtFLC</i>         | 574     | 8.16E-15         | RL                 |
| AT5G49360       | Chr5 | 20011879 | 20016742 |                      | 574     | 3.86E-02         | RL                 |
| AT5G60910       | Chr5 | 24502482 | 24506143 |                      | 574     | 1.57E-03         | RL                 |
| AT5G63120       | Chr5 | 25318752 | 25322265 | <i>AtRH30</i>        | 574     | 1.51E-05         | RL                 |
| S5_3586939      | Chr5 | 3586939  | 3586939  |                      | 620     | 3.57E-02         | DTF1               |
| S5_18590591     | Chr5 | 18590247 | 18593973 | <i>AtDOG1</i>        | 620     | 2.00E-03         | DTF1               |
| S5_18606627     | Chr5 | 18605854 | 18607771 |                      | 620     | 2.30E-02         | DTF1               |
| S5_3147133      | Chr5 | 3147133  | 3147133  |                      | 618     | 2.68E-02         | DTF2               |
| S5_3586939      | Chr5 | 3586939  | 3586939  |                      | 618     | 2.05E-02         | DTF2               |
| S5_18590501     | Chr5 | 18590247 | 18593973 | <i>AtDOG1</i>        | 618     | 3.29E-04         | DTF2               |
| S5_18607056     | Chr5 | 18605854 | 18607771 |                      | 618     | 2.05E-02         | DTF2               |
| S1_23453207     | Chr1 | 23453207 | 23453921 |                      | 613     | 3.87E-02         | DTF3               |
| S5_18590591     | Chr5 | 18590247 | 18598332 | <i>AtDOG1</i>        | 613     | 1.94E-04         | DTF3               |
| S5_18606627     | Chr5 | 18605854 | 18607771 |                      | 613     | 3.87E-02         | DTF3               |

<sup>a</sup>, Genes ID identified by TWAS or leading SNPs ID of loci identified by GWAS; <sup>b</sup>, symbols of known flowering related genes were listed; <sup>c</sup>, FDR (false discovery rate) of leading SNPs of loci identified by GWAS were listed; <sup>d</sup>, DTF1, days until emergence of visible flowering buds in the center of the rosette from time of sowing; DTF2, days until the inflorescence stem elongated to 1cm; DTF3, days until first open flower; CL, cauline leaf number; RL, rosette leaf number.

**Supplemental Table S2.** Summary of leaf RNA-seq data and processing and pubescence colors of component genotypes from a soybean diversity panel.

| Plant ID   | Experiment | Raw Reads   | Raw Length (bp) | Trimmed Reads | Trimmed Length (bp) | Uniquely Aligned Reads | Pubescence Color |
|------------|------------|-------------|-----------------|---------------|---------------------|------------------------|------------------|
| PI665057   | SRX2892154 | 255,973,378 | 126             | 252,811,220   | 125                 | 207,041,114            |                  |
|            | SRX2892155 | 88,462,006  | 126             | 87,230,864    | 124                 | 67,777,680             |                  |
|            | SRX2892156 | 97,496,050  | 126             | 96,181,833    | 124                 | 74,126,896             |                  |
|            | SRX2892157 | 101,352,060 | 126             | 99,925,603    | 124                 | 76,886,746             |                  |
|            | SRX2892158 | 105,118,408 | 126             | 103,702,536   | 124                 | 81,694,195             |                  |
| PI643395   | SRX2892159 | 85,236,794  | 126             | 84,060,935    | 124                 | 64,424,807             |                  |
|            | SRX2892160 | 109,721,766 | 126             | 107,841,933   | 124                 | 84,343,011             |                  |
| PI643146   | SRX2892161 | 98,929,072  | 126             | 97,464,621    | 124                 | 78,200,961             |                  |
| PI639740   | SRX2892162 | 292,512,022 | 126             | 288,630,285   | 125                 | 237,598,560            |                  |
|            | SRX2892163 | 112,466,924 | 126             | 110,573,992   | 124                 | 88,851,313             |                  |
|            | SRX2892164 | 86,472,748  | 126             | 84,970,395    | 124                 | 67,387,933             |                  |
|            | SRX2892165 | 98,115,798  | 126             | 96,364,661    | 124                 | 74,350,400             |                  |
| PI595362   | SRX2892166 | 104,767,366 | 126             | 103,036,496   | 124                 | 81,058,267             |                  |
| PI598124   | SRX2892167 | 92,165,032  | 126             | 90,684,326    | 124                 | 70,974,687             | gray             |
|            | SRX2892168 | 107,961,764 | 126             | 105,873,376   | 124                 | 89,468,567             |                  |
|            | SRX2892169 | 108,560,814 | 126             | 104,399,086   | 123                 | 84,996,111             |                  |
| PI639693   | SRX2892170 | 105,677,640 | 126             | 103,627,024   | 124                 | 88,595,163             |                  |
|            | SRX2892171 | 107,498,836 | 126             | 105,316,114   | 124                 | 86,461,578             |                  |
|            | SRX2892172 | 88,639,108  | 126             | 87,023,569    | 124                 | 70,998,498             |                  |
|            | SRX2892173 | 101,795,094 | 126             | 99,519,946    | 124                 | 82,684,001             |                  |
|            | SRX2892174 | 113,228,534 | 126             | 111,165,310   | 124                 | 90,764,636             |                  |
|            | SRX2892175 | 104,299,138 | 126             | 102,114,736   | 124                 | 84,180,829             |                  |
|            | SRX2892176 | 82,339,610  | 126             | 80,696,415    | 124                 | 66,966,231             |                  |
|            | SRX2892177 | 105,244,404 | 126             | 103,489,340   | 124                 | 84,404,971             |                  |
| SRX2892178 | 97,984,998 | 126         | 96,160,770      | 124           | 78,132,649          |                        |                  |
| PI602995   | SRX2892179 | 108,966,310 | 126             | 106,741,854   | 124                 | 83,128,871             |                  |
| PI615553   | SRX2892180 | 113,132,382 | 126             | 111,326,879   | 124                 | 85,036,857             | tawny            |
| PI633730   | SRX2892181 | 101,481,190 | 126             | 99,918,424    | 125                 | 75,100,440             | gray             |
| PI633731   | SRX2892182 | 111,742,852 | 126             | 110,226,872   | 125                 | 86,207,768             | gray             |
| PI639283   | SRX2892183 | 115,553,786 | 126             | 113,882,868   | 125                 | 88,839,483             | gray             |
| PI639285   | SRX2892184 | 74,697,254  | 126             | 73,473,684    | 124                 | 56,544,974             | tawny            |
|            | SRX2892185 | 81,252,414  | 126             | 79,698,803    | 124                 | 62,915,246             |                  |
| PI664025   | SRX2892186 | 106,984,044 | 126             | 105,437,297   | 124                 | 83,467,638             |                  |
| PI398881   | SRX2892187 | 102,913,138 | 126             | 101,484,365   | 124                 | 79,341,521             | tawny            |
| PI427136   | SRX2892188 | 82,766,498  | 126             | 81,539,076    | 124                 | 62,946,244             | tawny            |
| PI437169B  | SRX2892189 | 92,717,974  | 126             | 91,387,774    | 124                 | 72,546,126             | gray             |
| PI507681B  | SRX2892190 | 89,287,750  | 126             | 88,068,626    | 125                 | 65,673,550             | gray             |
| PI518751   | SRX2892191 | 141,734,412 | 126             | 139,591,246   | 125                 | 112,179,831            | gray             |
| PI561370   | SRX2892192 | 72,976,176  | 126             | 71,963,020    | 125                 | 60,148,329             | tawny            |

| Plant ID  | Experiment | Raw Reads   | Raw Length (bp) | Trimmed Reads | Trimmed Length (bp) | Uniquely Aligned Reads | Pubescence Color |
|-----------|------------|-------------|-----------------|---------------|---------------------|------------------------|------------------|
| PI404188A | SRX2892193 | 128,636,542 | 126             | 126,348,950   | 124                 | 105,786,419            | tawny            |
| PI574486  | SRX2892194 | 126,021,788 | 126             | 123,862,593   | 124                 | 102,988,605            | tawny            |
| FC33243   | SRX2892195 | 35,267,724  | 126             | 34,815,265    | 125                 | 21,273,763             | gray             |
| PI508266  | SRX2892196 | 36,949,010  | 126             | 36,498,708    | 125                 | 30,819,113             | gray             |
| PI518671  | SRX2892197 | 33,574,209  | 126             | 33,174,526    | 125                 | 29,089,960             | tawny            |
| PI518673  | SRX2892198 | 32,323,129  | 126             | 31,962,441    | 125                 | 28,164,192             | tawny            |
| PI548298  | SRX2892199 | 43,818,940  | 126             | 43,227,587    | 125                 | 36,893,248             | gray             |
| PI548311  | SRX2892200 | 25,225,880  | 126             | 24,950,875    | 125                 | 21,921,208             | tawny            |
| PI153243  | SRX2892201 | 34,082,180  | 126             | 33,689,873    | 125                 | 27,394,606             | tawny            |
| PI157434  | SRX2892202 | 32,187,717  | 126             | 31,849,056    | 125                 | 28,102,028             | tawny            |
| PI548356  | SRX2892203 | 29,301,256  | 126             | 28,945,016    | 125                 | 25,171,934             | gray             |
| PI548360  | SRX2892204 | 28,903,228  | 126             | 28,590,065    | 125                 | 24,273,945             | tawny            |
| PI548362  | SRX2892205 | 42,880,713  | 126             | 42,388,736    | 125                 | 36,489,700             | tawny            |
| PI548378  | SRX2892206 | 28,848,630  | 126             | 28,530,300    | 125                 | 25,096,244             | gray             |
| PI548391  | SRX2892207 | 24,683,185  | 126             | 24,387,937    | 125                 | 20,544,273             | gray             |
| PI548406  | SRX2892208 | 39,622,508  | 126             | 39,213,066    | 125                 | 33,921,440             | gray             |
| PI438343  | SRX2892209 | 28,590,400  | 126             | 28,279,718    | 125                 | 23,638,606             | gray             |
| PI548477  | SRX2892210 | 29,943,276  | 126             | 29,675,061    | 125                 | 24,767,701             | gray             |
| PI548484  | SRX2892211 | 26,014,531  | 126             | 25,754,379    | 125                 | 22,755,813             | gray             |
| PI548485  | SRX2892212 | 24,653,788  | 126             | 24,408,571    | 125                 | 20,279,096             | gray             |
| PI548488  | SRX2892213 | 28,383,203  | 126             | 28,109,542    | 125                 | 23,915,238             | gray             |
| PI548493  | SRX2892214 | 25,811,733  | 126             | 25,520,915    | 125                 | 22,336,447             | gray             |
| PI548505  | SRX2892215 | 26,770,058  | 126             | 26,442,048    | 125                 | 23,312,769             | gray             |
| PI548510  | SRX2892216 | 28,494,574  | 126             | 28,205,613    | 125                 | 24,696,429             | gray             |
| PI548512  | SRX2892217 | 31,571,101  | 126             | 31,241,960    | 125                 | 26,811,621             | tawny            |
| PI548516  | SRX2892218 | 42,621,875  | 126             | 42,239,269    | 125                 | 35,067,757             | gray             |
| PI548517  | SRX2892219 | 23,943,941  | 126             | 23,709,081    | 125                 | 20,303,020             | gray             |
| PI548523  | SRX2892220 | 22,366,748  | 126             | 22,135,761    | 125                 | 18,704,380             | tawny            |
| PI548527  | SRX2892221 | 24,911,096  | 126             | 24,646,444    | 125                 | 19,582,610             | tawny            |
| PI548530  | SRX2892222 | 22,643,466  | 126             | 22,379,240    | 125                 | 18,308,708             | tawny            |
| PI548533  | SRX2892223 | 26,126,232  | 126             | 25,788,472    | 125                 | 22,076,524             | tawny            |
| PI548540  | SRX2892224 | 26,581,871  | 126             | 26,315,683    | 125                 | 21,927,530             | gray             |
| PI548542  | SRX2892225 | 30,719,815  | 126             | 30,399,787    | 125                 | 25,413,701             | gray             |
| PI548543  | SRX2892226 | 24,481,958  | 126             | 24,267,284    | 125                 | 20,630,627             | tawny            |
| PI438364  | SRX2892227 | 29,870,734  | 126             | 29,577,532    | 124                 | 24,614,398             | tawny            |
| PI548555  | SRX2892228 | 29,675,192  | 126             | 29,362,382    | 125                 | 24,791,304             | tawny            |
| PI548562  | SRX2892229 | 40,720,401  | 126             | 40,313,194    | 125                 | 34,433,248             | tawny            |
| PI548570  | SRX2892230 | 38,838,586  | 126             | 38,369,896    | 125                 | 32,366,543             | gray             |
| PI548573  | SRX2892231 | 16,355,647  | 126             | 16,189,058    | 125                 | 13,972,373             | gray             |
| PI548574  | SRX2892232 | 31,272,756  | 126             | 30,953,198    | 125                 | 25,790,005             | tawny            |
| PI548577  | SRX2892233 | 41,471,710  | 126             | 41,032,250    | 125                 | 35,369,569             | gray             |
| PI548586  | SRX2892234 | 43,927,068  | 126             | 43,407,189    | 125                 | 37,218,168             | tawny            |

| Plant ID | Experiment | Raw Reads  | Raw Length (bp) | Trimmed Reads | Trimmed Length (bp) | Uniquely Aligned Reads | Pubescence Color |
|----------|------------|------------|-----------------|---------------|---------------------|------------------------|------------------|
| PI548603 | SRX2892235 | 45,926,930 | 126             | 45,448,017    | 125                 | 35,392,301             | gray             |
| PI548628 | SRX2892236 | 39,168,304 | 126             | 38,772,209    | 125                 | 33,989,591             | tawny            |
| PI548631 | SRX2892237 | 23,342,275 | 126             | 23,058,015    | 124                 | 19,453,866             | tawny            |
| PI548632 | SRX2892238 | 18,820,293 | 126             | 18,571,076    | 125                 | 14,807,897             | tawny            |
| PI548634 | SRX2892239 | 13,018,129 | 126             | 12,883,649    | 125                 | 10,778,320             | gray             |
| PI548654 | SRX2892240 | 29,578,196 | 126             | 29,227,497    | 125                 | 24,326,177             | tawny            |
| PI548657 | SRX2892241 | 52,875,393 | 126             | 52,138,138    | 125                 | 33,713,573             | gray             |
| PI548975 | SRX2892242 | 33,668,604 | 126             | 33,282,469    | 125                 | 28,440,504             | tawny            |
| PI548980 | SRX2892243 | 34,237,997 | 126             | 33,823,080    | 125                 | 28,074,043             | gray             |
| PI548983 | SRX2892244 | 24,384,754 | 126             | 24,050,362    | 124                 | 19,214,082             | tawny            |
| PI548986 | SRX2892245 | 35,225,863 | 126             | 34,743,749    | 124                 | 25,640,598             | gray             |
| PI548987 | SRX2892246 | 15,467,540 | 126             | 15,304,627    | 125                 | 13,080,504             | gray             |
| PI548988 | SRX2892247 | 35,222,071 | 126             | 34,772,369    | 124                 | 27,529,638             | gray             |
| PI548989 | SRX2892248 | 42,861,098 | 126             | 42,284,421    | 124                 | 31,160,392             | tawny            |
| PI553039 | SRX2892249 | 47,351,305 | 126             | 46,712,033    | 124                 | 35,838,575             | gray             |
| PI553046 | SRX2892250 | 34,791,550 | 126             | 34,255,449    | 124                 | 28,666,918             | gray             |
| PI572239 | SRX2892251 | 37,190,413 | 126             | 36,714,957    | 124                 | 28,969,569             | gray             |
| PI617045 | SRX2892252 | 33,758,225 | 126             | 33,304,555    | 125                 | 25,040,740             | gray             |
| PI630984 | SRX2892253 | 24,009,516 | 126             | 23,677,833    | 124                 | 18,134,283             | gray             |
| PI641156 | SRX2892254 | 19,759,796 | 126             | 19,457,173    | 124                 | 17,419,562             | tawny            |
| PI88788  | SRX2892255 | 24,212,254 | 126             | 23,980,996    | 125                 | 20,435,647             | tawny            |



**Supplemental Table S3.** Summary of seedling RNA-Seq data and processing and endosperm colors of component genotypes from a maize diversity panel.

| Name     | Experiment | Raw Reads  | Raw Length (bp) | Trimmed Reads | Trimmed Length (bp) | Uniquely Aligned Reads | Endosperm Color |
|----------|------------|------------|-----------------|---------------|---------------------|------------------------|-----------------|
| 04033V   | SRX242938  | 24,005,464 | 100             | 23,269,953    | 96                  | 18,317,279             |                 |
| 33-16    | SRX242939  | 32,795,188 | 100             | 31,821,546    | 96                  | 25,292,086             | white           |
| Nov-38   | SRX242940  | 28,299,606 | 100             | 27,613,087    | 97                  | 22,205,074             | yellow          |
| 4226     | SRX242934  | 24,722,102 | 100             | 23,832,771    | 96                  | 18,802,044             | yellow          |
| 4554     | SRX242941  | 23,128,692 | 100             | 22,678,280    | 97                  | 17,985,963             |                 |
| 4578     | SRX242942  | 16,592,482 | 100             | 14,883,662    | 94                  | 10,586,619             |                 |
| 4722     | SRX242935  | 19,847,150 | 100             | 19,293,120    | 96                  | 15,332,674             | yellow          |
| 4F-35_BK | SRX242943  | 24,032,968 | 100             | 23,548,972    | 98                  | 18,877,574             |                 |
| 52220    | SRX242937  | 11,145,248 | 100             | 10,565,707    | 95                  | 8,365,021              | white           |
| Feb-80   | SRX242944  | 20,531,496 | 100             | 19,400,615    | 97                  | 15,163,766             | yellow          |
| A        | SRX242936  | 19,229,018 | 100             | 18,193,358    | 95                  | 14,228,407             |                 |
| A12      | SRX242945  | 22,483,492 | 100             | 21,423,649    | 97                  | 16,867,329             | yellow          |
| A15      | SRX242946  | 13,120,210 | 100             | 12,651,049    | 97                  | 9,650,286              | yellow          |
| A155     | SRX242947  | 18,723,284 | 100             | 18,357,668    | 96                  | 14,824,824             | yellow          |
| A171     | SRX242948  | 16,107,794 | 100             | 15,615,558    | 97                  | 12,417,976             | white           |
| A188     | SRX242949  | 37,129,290 | 100             | 36,253,939    | 97                  | 29,280,785             | white           |
| A208     | SRX242950  | 28,903,930 | 100             | 28,147,759    | 96                  | 22,794,909             | yellow          |
| A239     | SRX242951  | 12,738,974 | 100             | 12,402,388    | 96                  | 9,945,373              | yellow          |
| A258     | SRX242952  | 32,180,286 | 100             | 31,166,668    | 96                  | 24,717,113             | yellow          |
| A305     | SRX242953  | 15,519,592 | 100             | 14,434,792    | 95                  | 10,962,200             | white           |
| A321     | SRX242954  | 12,971,370 | 100             | 12,049,706    | 95                  | 8,414,165              | yellow          |
| A322     | SRX242955  | 10,000,034 | 100             | 9,720,848     | 97                  | 7,737,541              | yellow          |
| A334     | SRX242956  | 10,041,120 | 100             | 9,672,570     | 96                  | 7,531,373              | yellow          |
| A340     | SRX242957  | 21,089,740 | 100             | 20,547,797    | 96                  | 16,463,531             | yellow          |
| A374     | SRX242958  | 18,609,684 | 100             | 17,792,165    | 96                  | 14,129,588             | yellow          |
| A385     | SRX242959  | 16,867,022 | 100             | 16,428,600    | 98                  | 13,199,197             | yellow          |
| A401     | SRX242960  | 30,027,052 | 100             | 28,932,480    | 96                  | 22,956,565             | yellow          |
| A415-1-3 | SRX242961  | 21,661,742 | 100             | 21,120,335    | 98                  | 16,662,471             |                 |
| A427     | SRX242962  | 22,687,142 | 100             | 21,728,929    | 96                  | 16,892,907             | yellow          |
| A554     | SRX242963  | 24,254,718 | 100             | 23,626,607    | 97                  | 19,059,578             |                 |
| A572     | SRX242964  | 12,292,198 | 100             | 11,844,100    | 98                  | 9,303,229              | yellow          |
| A627     | SRX242965  | 13,465,994 | 100             | 12,672,880    | 95                  | 8,982,691              | yellow          |
| A632     | SRX242966  | 26,927,566 | 100             | 25,914,383    | 95                  | 21,347,665             | yellow          |
| A635     | SRX242967  | 21,773,834 | 100             | 21,044,872    | 96                  | 17,380,473             | yellow          |
| A648     | SRX242968  | 18,498,528 | 100             | 17,460,007    | 97                  | 13,434,569             | yellow          |
| A649     | SRX242969  | 22,201,614 | 100             | 21,735,811    | 97                  | 17,480,170             | yellow          |
| A651     | SRX242970  | 14,770,738 | 100             | 14,318,337    | 98                  | 11,392,235             | yellow          |
| A659     | SRX242971  | 23,369,942 | 100             | 22,821,793    | 97                  | 18,180,745             | yellow          |
| A661     | SRX242972  | 22,479,808 | 100             | 21,750,995    | 96                  | 17,351,165             | yellow          |

| Name           | Experiment | Raw Reads  | Raw Length (bp) | Trimmed Reads | Trimmed Length (bp) | Uniquely Aligned Reads | Endosperm Color |
|----------------|------------|------------|-----------------|---------------|---------------------|------------------------|-----------------|
| A662           | SRX242973  | 13,722,724 | 100             | 13,280,205    | 97                  | 10,391,891             | yellow          |
| A663           | SRX242974  | 30,421,220 | 100             | 29,790,543    | 98                  | 24,003,641             |                 |
| A673           | SRX242975  | 17,269,606 | 100             | 16,631,986    | 96                  | 13,180,348             | yellow          |
| A674           | SRX242976  | 17,755,232 | 100             | 16,854,295    | 97                  | 12,739,259             | yellow          |
| A679           | SRX242977  | 19,808,164 | 100             | 19,220,434    | 96                  | 16,152,321             |                 |
| A680           | SRX242978  | 16,318,942 | 100             | 15,639,378    | 96                  | 13,061,195             | yellow          |
| A682           | SRX242979  | 33,558,322 | 100             | 32,709,579    | 97                  | 26,303,993             | yellow          |
| A71            | SRX242980  | 17,421,386 | 100             | 16,511,326    | 97                  | 12,994,397             | yellow          |
| A73            | SRX242981  | 40,999,812 | 100             | 38,266,698    | 94                  | 27,578,097             | yellow          |
| A797NW         | SRX242982  | 30,289,272 | 100             | 29,687,079    | 97                  | 23,738,152             |                 |
| AR228          | SRX242983  | 23,395,318 | 100             | 22,838,175    | 97                  | 18,285,232             | yellow          |
| AS5707         | SRX242984  | 11,576,358 | 100             | 10,982,947    | 96                  | 8,440,062              |                 |
| AusTRCF_306238 | SRX242985  | 15,046,496 | 100             | 14,751,773    | 97                  | 11,890,292             | white           |
| B-18           | SRX242986  | 17,499,546 | 100             | 17,023,599    | 97                  | 13,567,592             | yellow          |
| B-28           | SRX242987  | 20,251,912 | 100             | 19,617,462    | 96                  | 15,528,823             |                 |
| B10            | SRX242988  | 22,187,846 | 100             | 21,484,169    | 96                  | 16,740,673             | yellow          |
| B101           | SRX242989  | 36,495,788 | 100             | 35,475,482    | 96                  | 28,725,655             | yellow          |
| B103           | SRX242990  | 15,805,680 | 100             | 15,396,887    | 96                  | 12,646,461             | yellow          |
| B104           | SRX242991  | 19,266,072 | 100             | 18,500,209    | 96                  | 15,272,534             | yellow          |
| B105           | SRX242992  | 10,388,032 | 100             | 10,047,865    | 96                  | 8,080,656              | yellow          |
| B106           | SRX242993  | 27,549,158 | 100             | 26,696,910    | 96                  | 21,349,304             | yellow          |
| B107           | SRX242994  | 17,014,296 | 100             | 16,564,730    | 96                  | 13,017,271             | yellow          |
| B108           | SRX242995  | 27,771,418 | 100             | 24,977,464    | 93                  | 18,205,117             | yellow          |
| B109           | SRX242996  | 31,630,372 | 100             | 30,484,209    | 96                  | 25,567,691             | yellow          |
| B110           | SRX242997  | 17,238,876 | 100             | 16,387,105    | 96                  | 13,234,731             |                 |
| B111           | SRX242998  | 34,751,884 | 100             | 33,264,889    | 95                  | 25,125,358             |                 |
| B112           | SRX242999  | 12,499,698 | 100             | 12,167,751    | 96                  | 9,901,964              |                 |
| B113           | SRX243000  | 24,451,918 | 100             | 23,440,543    | 96                  | 18,027,401             |                 |
| B114           | SRX243001  | 15,800,456 | 100             | 13,983,795    | 91                  | 10,407,821             |                 |
| B115           | SRX243002  | 36,183,498 | 100             | 34,056,165    | 94                  | 26,661,671             | yellow          |
| B119           | SRX243003  | 21,145,648 | 100             | 20,634,981    | 96                  | 17,308,974             | yellow          |
| B120           | SRX243004  | 18,263,788 | 100             | 17,048,887    | 93                  | 11,933,296             | yellow          |
| B121           | SRX243005  | 19,997,130 | 100             | 19,471,621    | 96                  | 15,208,432             | yellow          |
| B14            | SRX243006  | 12,287,318 | 100             | 11,730,641    | 97                  | 9,383,740              | yellow          |
| B14A           | SRX243007  | 24,540,412 | 100             | 24,034,350    | 97                  | 19,891,054             | yellow          |
| B164           | SRX243008  | 16,146,442 | 100             | 15,388,409    | 96                  | 11,844,417             | yellow          |
| B2             | SRX243009  | 21,804,788 | 100             | 21,105,824    | 96                  | 16,674,085             | yellow          |
| B37            | SRX243010  | 12,356,438 | 100             | 12,020,234    | 97                  | 9,680,129              | yellow          |
| B42            | SRX243011  | 11,243,096 | 100             | 10,984,868    | 97                  | 8,732,581              | yellow          |
| B52            | SRX243012  | 14,568,912 | 100             | 14,209,936    | 96                  | 11,306,483             | yellow          |
| B54            | SRX243013  | 30,867,502 | 100             | 30,209,187    | 96                  | 23,569,320             | yellow          |

| Name        | Experiment | Raw Reads   | Raw Length (bp) | Trimmed Reads | Trimmed Length (bp) | Uniquely Aligned Reads | Endosperm Color |
|-------------|------------|-------------|-----------------|---------------|---------------------|------------------------|-----------------|
| B64         | SRX243014  | 13,892,908  | 100             | 13,493,585    | 97                  | 10,756,698             |                 |
| B66         | SRX243015  | 32,524,426  | 100             | 29,606,264    | 93                  | 21,880,095             | yellow          |
| B68         | SRX243016  | 17,353,392  | 100             | 16,883,812    | 97                  | 13,775,674             |                 |
| B7          | SRX243017  | 22,494,644  | 100             | 21,630,000    | 96                  | 17,354,500             | yellow          |
| B73         | SRX243018  | 620,811,458 | 100             | 601,489,274   | 96                  | 510,697,354            |                 |
| B75         | SRX243019  | 32,461,386  | 100             | 31,641,947    | 97                  | 25,236,329             |                 |
| B77         | SRX243020  | 41,410,410  | 100             | 40,416,309    | 97                  | 32,351,073             |                 |
| B79         | SRX243021  | 12,644,242  | 100             | 12,292,422    | 96                  | 10,046,675             |                 |
| B8          | SRX243022  | 20,152,462  | 100             | 19,522,078    | 96                  | 15,631,627             | yellow          |
| B84         | SRX243023  | 20,755,552  | 100             | 20,324,017    | 97                  | 16,812,780             |                 |
| B85         | SRX243024  | 39,107,470  | 100             | 35,363,723    | 94                  | 26,522,789             |                 |
| B87         | SRX243025  | 22,215,608  | 100             | 21,237,359    | 94                  | 16,112,724             | yellow          |
| B88         | SRX243026  | 25,210,218  | 100             | 24,082,291    | 96                  | 18,560,075             | yellow          |
| B90         | SRX243027  | 14,629,338  | 100             | 13,988,159    | 94                  | 10,994,262             |                 |
| B91         | SRX243028  | 12,051,256  | 100             | 11,673,980    | 96                  | 8,806,164              |                 |
| B97         | SRX243029  | 23,324,670  | 100             | 22,757,660    | 96                  | 18,106,411             | yellow          |
| B98         | SRX243030  | 28,648,514  | 100             | 27,758,958    | 96                  | 21,595,330             | yellow          |
| B99         | SRX243031  | 33,349,884  | 100             | 32,601,143    | 96                  | 25,847,983             | yellow          |
| C102        | SRX243032  | 47,013,574  | 100             | 45,088,803    | 95                  | 34,076,942             | yellow          |
| C103        | SRX243033  | 15,272,326  | 100             | 14,898,236    | 96                  | 12,040,302             | yellow          |
| C123        | SRX243034  | 21,420,240  | 100             | 20,682,990    | 96                  | 16,601,810             | yellow          |
| C15         | SRX243035  | 18,549,480  | 100             | 17,963,712    | 96                  | 13,984,275             |                 |
| C42         | SRX243036  | 17,148,850  | 100             | 16,447,545    | 95                  | 12,194,654             | yellow          |
| C49A        | SRX243037  | 19,810,948  | 100             | 19,319,650    | 96                  | 15,629,860             | yellow          |
| C68         | SRX243038  | 12,415,470  | 100             | 11,511,338    | 94                  | 8,406,453              |                 |
| CG10        | SRX243039  | 18,848,266  | 100             | 18,312,716    | 96                  | 14,768,055             | yellow          |
| CG106       | SRX243040  | 12,998,272  | 100             | 12,512,712    | 96                  | 9,874,961              |                 |
| CG108       | SRX243041  | 13,761,954  | 100             | 13,417,573    | 96                  | 10,648,317             |                 |
| CG65        | SRX243042  | 16,668,124  | 100             | 16,287,804    | 96                  | 13,229,901             | yellow          |
| CH157       | SRX243043  | 18,663,844  | 100             | 17,002,560    | 93                  | 12,530,388             | yellow          |
| CH701-30    | SRX243044  | 27,640,438  | 100             | 27,032,339    | 97                  | 21,515,140             | yellow          |
| CH753-4     | SRX243045  | 11,941,816  | 100             | 11,648,299    | 96                  | 9,520,873              | yellow          |
| CH9         | SRX243046  | 23,444,830  | 100             | 22,256,995    | 96                  | 17,380,169             | yellow          |
| Chi-tan_120 | SRX243047  | 42,179,850  | 100             | 39,002,009    | 92                  | 29,826,088             |                 |
| CI_40H      | SRX243048  | 14,044,714  | 100             | 13,718,822    | 97                  | 11,086,108             | yellow          |
| CI187-2     | SRX243049  | 15,136,124  | 100             | 14,807,192    | 96                  | 11,951,546             | yellow          |
| CI21E       | SRX243050  | 39,180,374  | 100             | 37,193,295    | 96                  | 29,558,727             | yellow          |
| CI28A       | SRX243051  | 13,975,786  | 100             | 13,564,716    | 96                  | 10,961,249             | yellow          |
| CI31A       | SRX243052  | 22,521,234  | 100             | 22,028,591    | 97                  | 17,787,363             | yellow          |
| CI3A        | SRX243053  | 14,697,184  | 100             | 14,332,309    | 96                  | 11,609,147             | yellow          |
| CI64        | SRX243054  | 36,636,398  | 100             | 35,178,921    | 96                  | 27,922,754             | white           |

| Name   | Experiment | Raw Reads   | Raw Length (bp) | Trimmed Reads | Trimmed Length (bp) | Uniquely Aligned Reads | Endosperm Color |
|--------|------------|-------------|-----------------|---------------|---------------------|------------------------|-----------------|
| CI90C  | SRX243055  | 25,375,224  | 100             | 24,748,438    | 96                  | 20,068,015             | yellow          |
| CI91B  | SRX243056  | 15,552,462  | 100             | 15,035,171    | 95                  | 12,198,652             | yellow          |
| CL17   | SRX243057  | 20,826,096  | 100             | 20,214,388    | 97                  | 16,026,882             |                 |
| CL18   | SRX243058  | 24,251,010  | 100             | 21,978,046    | 93                  | 16,089,179             | yellow          |
| CL22   | SRX243059  | 19,077,372  | 100             | 18,522,533    | 97                  | 14,581,366             | yellow          |
| CL27   | SRX243060  | 14,371,610  | 100             | 13,521,339    | 93                  | 10,387,851             | yellow          |
| CM105  | SRX243061  | 17,019,952  | 100             | 16,450,760    | 96                  | 13,236,361             | yellow          |
| CM174  | SRX243062  | 16,700,752  | 100             | 16,323,625    | 96                  | 13,006,778             | yellow          |
| CM37   | SRX243063  | 106,538,336 | 100             | 103,844,769   | 96                  | 84,522,243             | yellow          |
| CM48   | SRX243064  | 8,812,218   | 100             | 8,510,027     | 96                  | 6,605,581              | yellow          |
| CM7    | SRX243065  | 16,767,432  | 100             | 16,103,423    | 96                  | 12,847,243             | yellow          |
| CM99   | SRX243066  | 36,769,336  | 100             | 35,795,388    | 96                  | 28,528,535             | yellow          |
| CML108 | SRX243067  | 17,703,232  | 100             | 17,218,274    | 97                  | 13,771,418             | white           |
| CML144 | SRX243068  | 12,973,398  | 100             | 12,359,118    | 96                  | 9,472,611              | white           |
| CML161 | SRX243069  | 19,030,352  | 100             | 18,598,468    | 96                  | 15,001,291             |                 |
| CML176 | SRX243070  | 28,645,220  | 100             | 27,513,956    | 97                  | 21,806,997             | white           |
| CML197 | SRX243071  | 10,406,702  | 100             | 10,009,097    | 96                  | 7,779,851              |                 |
| CML202 | SRX243072  | 13,967,214  | 100             | 13,415,580    | 96                  | 10,412,005             |                 |
| CML216 | SRX243073  | 14,567,546  | 100             | 14,157,832    | 97                  | 11,207,707             |                 |
| CML218 | SRX243074  | 14,266,154  | 100             | 13,874,084    | 96                  | 10,880,755             | white           |
| CML220 | SRX243075  | 14,950,216  | 100             | 14,566,279    | 97                  | 11,673,008             | white           |
| CML228 | SRX243076  | 23,042,754  | 100             | 22,261,446    | 97                  | 17,568,093             | yellow          |
| CML247 | SRX243077  | 21,475,696  | 100             | 20,860,338    | 96                  | 16,671,168             | white           |
| CML251 | SRX243078  | 25,618,132  | 100             | 25,040,959    | 97                  | 20,095,642             |                 |
| CML254 | SRX243079  | 21,341,752  | 100             | 20,723,001    | 96                  | 16,908,071             | white           |
| CML264 | SRX243080  | 26,061,104  | 100             | 25,135,117    | 96                  | 19,452,538             | white           |
| CML277 | SRX243081  | 14,482,098  | 100             | 14,000,567    | 96                  | 11,149,923             | white           |
| CML287 | SRX243082  | 31,838,856  | 100             | 29,460,818    | 95                  | 22,660,499             | yellow          |
| CML312 | SRX243083  | 9,501,776   | 100             | 9,307,314     | 97                  | 7,413,869              |                 |
| CML322 | SRX243084  | 21,646,122  | 100             | 20,531,490    | 95                  | 15,440,047             | white           |
| CML323 | SRX243085  | 12,505,574  | 100             | 12,183,654    | 96                  | 9,859,894              |                 |
| CML376 | SRX243086  | 15,080,634  | 100             | 14,705,209    | 97                  | 11,763,962             | white           |
| CML421 | SRX243087  | 26,010,674  | 100             | 23,933,724    | 94                  | 18,292,125             |                 |
| CML444 | SRX243088  | 23,525,048  | 100             | 22,833,759    | 96                  | 18,290,585             |                 |
| CML448 | SRX243089  | 11,105,770  | 100             | 10,784,416    | 96                  | 8,638,905              |                 |
| CML451 | SRX243090  | 8,980,528   | 100             | 8,797,073     | 97                  | 7,090,341              |                 |
| CML456 | SRX243091  | 22,355,646  | 100             | 21,383,811    | 96                  | 16,990,458             |                 |
| CML465 | SRX243092  | 88,013,816  | 100             | 83,611,653    | 91                  | 63,749,877             |                 |
| CML488 | SRX243093  | 17,838,186  | 100             | 17,272,031    | 97                  | 13,416,068             |                 |
| CML491 | SRX243094  | 21,952,744  | 100             | 20,885,086    | 96                  | 16,358,203             |                 |
| CML505 | SRX243095  | 22,970,278  | 100             | 21,901,896    | 92                  | 16,967,227             |                 |

| Name        | Experiment | Raw Reads   | Raw Length (bp) | Trimmed Reads | Trimmed Length (bp) | Uniquely Aligned Reads | Endosperm Color |
|-------------|------------|-------------|-----------------|---------------|---------------------|------------------------|-----------------|
| CML509      | SRX243096  | 16,471,464  | 100             | 15,789,392    | 96                  | 12,541,128             |                 |
| CML511      | SRX243097  | 16,120,682  | 100             | 15,776,319    | 96                  | 12,781,545             |                 |
| CML52       | SRX243098  | 24,280,230  | 100             | 23,815,342    | 98                  | 18,551,068             |                 |
| CML91       | SRX243099  | 22,170,670  | 100             | 21,561,067    | 97                  | 16,791,608             | white           |
| CO106       | SRX243100  | 19,397,294  | 100             | 18,892,729    | 96                  | 15,279,746             | yellow          |
| CO117       | SRX243101  | 21,845,330  | 100             | 21,283,350    | 96                  | 15,766,461             | yellow          |
| CO125       | SRX243102  | 24,253,546  | 100             | 23,678,969    | 96                  | 19,164,279             | yellow          |
| CO158       | SRX243103  | 25,223,236  | 100             | 23,099,180    | 93                  | 16,899,634             | yellow          |
| CO192       | SRX243104  | 15,109,150  | 100             | 14,381,034    | 96                  | 11,057,517             | yellow          |
| CO216       | SRX243105  | 31,784,140  | 100             | 29,718,731    | 93                  | 23,045,934             | yellow          |
| CO236       | SRX243106  | 38,059,920  | 100             | 34,769,714    | 91                  | 26,571,231             | yellow          |
| CO237       | SRX243107  | 37,638,594  | 100             | 34,750,857    | 92                  | 26,522,077             | yellow          |
| CO245       | SRX243108  | 23,999,606  | 100             | 23,433,675    | 97                  | 18,343,222             | yellow          |
| CO255       | SRX243109  | 16,745,662  | 100             | 15,868,392    | 96                  | 12,167,973             | yellow          |
| CO256       | SRX243110  | 12,314,772  | 100             | 11,532,905    | 93                  | 8,748,941              | yellow          |
| CO257       | SRX243111  | 11,368,890  | 100             | 10,999,852    | 96                  | 8,791,115              | yellow          |
| CO258       | SRX243112  | 15,281,734  | 100             | 13,932,317    | 92                  | 11,098,822             | yellow          |
| CR_22       | SRX243113  | 17,243,458  | 100             | 16,494,083    | 96                  | 12,983,380             |                 |
| CR1HT       | SRX243114  | 15,123,926  | 100             | 14,429,727    | 97                  | 11,258,478             | yellow          |
| CSJ3        | SRX243115  | 15,503,330  | 100             | 14,632,638    | 94                  | 11,087,172             | yellow          |
| DE3         | SRX243116  | 38,809,274  | 100             | 37,168,385    | 95                  | 28,134,183             | yellow          |
| DE4         | SRX243117  | 20,488,066  | 100             | 19,719,009    | 96                  | 15,082,480             | yellow          |
| DE811       | SRX243118  | 22,186,712  | 100             | 21,607,699    | 96                  | 17,453,133             | yellow          |
| DK4676A     | SRX243119  | 23,335,890  | 100             | 22,194,113    | 95                  | 17,525,078             |                 |
| DK78371A    | SRX243120  | 14,953,092  | 100             | 14,558,130    | 96                  | 11,453,251             |                 |
| DKFBHJ      | SRX243121  | 22,430,134  | 100             | 21,927,514    | 96                  | 17,712,299             |                 |
| DKHBA1      | SRX243122  | 12,408,602  | 100             | 11,834,421    | 95                  | 9,104,610              |                 |
| DKIB014     | SRX243123  | 25,960,592  | 100             | 24,885,644    | 96                  | 19,618,005             |                 |
| DKIB02      | SRX243124  | 117,930,516 | 100             | 107,048,851   | 91                  | 76,919,144             |                 |
| DKMBNA      | SRX243125  | 13,352,170  | 100             | 12,662,018    | 94                  | 9,640,798              |                 |
| DKMBPM      | SRX243126  | 11,294,820  | 100             | 10,540,724    | 93                  | 8,068,893              |                 |
| DKMFD-13D   | SRX243127  | 19,804,834  | 100             | 18,337,839    | 93                  | 14,482,086             |                 |
| DKPB80      | SRX243128  | 13,218,342  | 100             | 12,792,337    | 96                  | 10,439,429             |                 |
| E2558W      | SRX243129  | 17,759,876  | 100             | 16,738,847    | 95                  | 13,131,953             | white           |
| EAST_028    | SRX243130  | 18,598,456  | 100             | 17,876,396    | 96                  | 13,873,411             |                 |
| Eng-Li_Chih | SRX243131  | 25,171,224  | 100             | 24,517,302    | 96                  | 19,429,004             |                 |
| EP1         | SRX243132  | 17,769,072  | 100             | 16,867,353    | 96                  | 13,140,256             | yellow          |
| F115        | SRX243133  | 26,728,294  | 100             | 26,133,328    | 96                  | 20,783,748             | yellow          |
| F2834T      | SRX243134  | 12,221,778  | 100             | 11,802,775    | 96                  | 8,991,977              | yellow          |
| F431        | SRX243135  | 26,548,810  | 100             | 25,886,037    | 96                  | 20,635,913             |                 |
| F44         | SRX243136  | 18,842,296  | 100             | 18,435,356    | 96                  | 14,589,855             | yellow          |

| Name     | Experiment | Raw Reads  | Raw Length (bp) | Trimmed Reads | Trimmed Length (bp) | Uniquely Aligned Reads | Endosperm Color |
|----------|------------|------------|-----------------|---------------|---------------------|------------------------|-----------------|
| F7       | SRX243137  | 26,117,798 | 100             | 25,515,164    | 97                  | 20,484,037             | yellow          |
| FC46     | SRX243138  | 47,368,860 | 100             | 46,042,072    | 96                  | 35,849,752             |                 |
| FR19     | SRX243139  | 11,661,022 | 100             | 11,215,239    | 96                  | 8,890,735              | yellow          |
| G22_T122 | SRX243140  | 23,360,432 | 100             | 22,818,368    | 96                  | 17,842,059             |                 |
| G3_T5a   | SRX243141  | 19,483,066 | 100             | 18,477,743    | 95                  | 14,088,409             |                 |
| G80      | SRX243142  | 18,233,960 | 100             | 17,031,076    | 94                  | 13,039,314             | yellow          |
| GE129    | SRX243143  | 26,506,548 | 100             | 25,866,430    | 97                  | 20,894,673             | white           |
| GE54     | SRX243144  | 15,332,152 | 100             | 14,570,198    | 94                  | 10,912,070             | yellow          |
| H110     | SRX243145  | 23,044,018 | 100             | 22,555,501    | 96                  | 18,083,886             | yellow          |
| H113     | SRX243146  | 18,818,632 | 100             | 18,333,361    | 96                  | 14,978,026             | yellow          |
| H114     | SRX243147  | 15,895,496 | 100             | 14,709,750    | 93                  | 10,838,084             | yellow          |
| H121     | SRX243148  | 19,581,414 | 100             | 18,921,641    | 96                  | 14,776,546             | yellow          |
| H122w    | SRX243149  | 26,503,368 | 100             | 25,725,949    | 96                  | 20,776,420             | white           |
| H124w    | SRX243150  | 22,156,810 | 100             | 20,799,639    | 92                  | 14,890,916             | white           |
| H14      | SRX243151  | 23,361,520 | 100             | 22,732,143    | 96                  | 18,071,269             | yellow          |
| H49      | SRX243152  | 13,573,968 | 100             | 13,196,807    | 96                  | 10,596,532             | yellow          |
| H5       | SRX243153  | 15,089,904 | 100             | 13,896,072    | 95                  | 10,464,492             | yellow          |
| H52      | SRX243154  | 16,372,436 | 100             | 15,970,016    | 97                  | 12,828,229             | yellow          |
| H71      | SRX243155  | 28,940,070 | 100             | 27,449,925    | 96                  | 20,675,378             | yellow          |
| H84      | SRX243156  | 24,769,040 | 100             | 24,024,815    | 96                  | 19,264,121             | yellow          |
| H91      | SRX243157  | 18,982,096 | 100             | 17,767,614    | 95                  | 14,051,688             | yellow          |
| H95      | SRX243158  | 43,249,892 | 100             | 40,172,131    | 95                  | 31,081,386             | yellow          |
| H96      | SRX243159  | 14,234,826 | 100             | 13,921,148    | 97                  | 11,280,046             | yellow          |
| H99      | SRX243160  | 27,800,046 | 100             | 26,421,196    | 91                  | 20,637,748             |                 |
| Hi26     | SRX243161  | 15,427,694 | 100             | 15,087,285    | 96                  | 11,862,542             | yellow          |
| Hi28     | SRX243162  | 18,896,338 | 100             | 18,420,730    | 96                  | 14,695,751             | yellow          |
| HP301    | SRX243163  | 29,366,804 | 100             | 28,077,987    | 96                  | 21,763,688             |                 |
| HP72-11  | SRX243164  | 19,864,640 | 100             | 19,456,952    | 97                  | 15,283,095             |                 |
| HUANYAO  | SRX243165  | 81,459,352 | 100             | 75,060,625    | 93                  | 53,786,596             |                 |
| HUOBAI   | SRX243166  | 13,057,388 | 100             | 11,967,524    | 92                  | 9,252,051              | white           |
| Hy       | SRX243167  | 30,609,436 | 100             | 29,890,736    | 96                  | 24,331,273             | yellow          |
| I159     | SRX243168  | 22,586,314 | 100             | 22,066,110    | 96                  | 18,014,568             | yellow          |
| I205     | SRX243169  | 30,904,650 | 100             | 29,098,401    | 92                  | 22,081,384             | yellow          |
| I29      | SRX243170  | 28,043,004 | 100             | 27,382,593    | 96                  | 21,808,498             | white           |
| Ia453    | SRX243171  | 15,353,392 | 100             | 14,977,295    | 97                  | 11,745,725             |                 |
| Ia5125B  | SRX243172  | 20,120,102 | 100             | 19,681,761    | 96                  | 15,430,074             | yellow          |
| IDS28    | SRX243173  | 32,795,238 | 100             | 31,585,933    | 96                  | 24,982,399             | yellow          |
| IDS69    | SRX243174  | 31,148,232 | 100             | 30,011,180    | 96                  | 23,474,142             | yellow          |
| II101T   | SRX243175  | 24,481,520 | 100             | 23,801,998    | 96                  | 19,005,282             |                 |
| II14H    | SRX243176  | 16,986,452 | 100             | 16,476,907    | 96                  | 13,109,634             | white           |
| II778d   | SRX243177  | 13,032,136 | 100             | 12,683,234    | 96                  | 10,189,556             | yellow          |

| Name             | Experiment | Raw Reads  | Raw Length (bp) | Trimmed Reads | Trimmed Length (bp) | Uniquely Aligned Reads | Endosperm Color |
|------------------|------------|------------|-----------------|---------------|---------------------|------------------------|-----------------|
| INBRED_100       | SRX243178  | 27,284,326 | 100             | 25,984,932    | 96                  | 20,020,713             | yellow          |
| INBRED_109       | SRX243179  | 91,288,954 | 100             | 85,395,412    | 93                  | 65,414,262             |                 |
| INBRED_141       | SRX243180  | 18,821,764 | 100             | 16,976,862    | 93                  | 12,653,872             | yellow          |
| INBRED_305       | SRX243181  | 16,116,566 | 100             | 14,525,318    | 91                  | 10,852,183             |                 |
| INBRED_309       | SRX243182  | 18,524,788 | 100             | 17,005,184    | 92                  | 13,190,783             |                 |
| K148             | SRX243183  | 20,735,780 | 100             | 20,200,322    | 96                  | 16,056,817             | yellow          |
| K150             | SRX243184  | 16,765,130 | 100             | 16,005,886    | 95                  | 12,408,252             | yellow          |
| K155             | SRX243185  | 21,995,690 | 100             | 21,264,689    | 96                  | 16,766,779             | yellow          |
| K201             | SRX243186  | 24,580,476 | 100             | 23,910,665    | 96                  | 18,734,621             | yellow          |
| K4               | SRX243187  | 29,420,124 | 100             | 27,819,707    | 95                  | 20,793,592             | yellow          |
| K41              | SRX243188  | 17,542,424 | 100             | 17,168,511    | 96                  | 13,711,797             | white           |
| K47              | SRX243189  | 18,500,488 | 100             | 17,966,968    | 97                  | 14,005,033             | yellow          |
| K55              | SRX243190  | 32,000,248 | 100             | 31,209,834    | 96                  | 25,075,559             | white           |
| K64              | SRX243191  | 29,292,140 | 100             | 28,358,080    | 97                  | 22,002,294             | white           |
| Ki11             | SRX243192  | 25,397,778 | 100             | 24,491,666    | 96                  | 18,991,501             |                 |
| Ki21             | SRX243193  | 13,402,274 | 100             | 13,028,788    | 96                  | 10,233,114             |                 |
| Ki3              | SRX243194  | 27,783,034 | 100             | 26,617,390    | 97                  | 20,988,030             |                 |
| Ki43             | SRX243195  | 18,553,702 | 100             | 17,255,248    | 95                  | 13,095,644             | yellow          |
| KO679Y           | SRX243196  | 10,363,296 | 100             | 9,930,783     | 95                  | 7,604,406              |                 |
| KUNG-70          | SRX243197  | 34,480,708 | 100             | 32,020,153    | 93                  | 23,353,457             |                 |
| Ky21             | SRX243198  | 15,798,186 | 100             | 15,101,053    | 92                  | 11,675,450             | white           |
| Ky226            | SRX243199  | 19,580,196 | 100             | 18,946,472    | 97                  | 14,893,122             | white           |
| Ky228            | SRX243200  | 26,288,722 | 100             | 25,797,231    | 97                  | 20,687,286             |                 |
| L_289            | SRX243201  | 37,680,132 | 100             | 36,599,319    | 96                  | 28,737,848             | yellow          |
| L317             | SRX243202  | 19,680,402 | 100             | 19,062,210    | 97                  | 14,837,984             | yellow          |
| LH1              | SRX243203  | 22,699,980 | 100             | 21,614,288    | 96                  | 17,100,709             | yellow          |
| LH123HT          | SRX243204  | 11,317,922 | 100             | 10,504,449    | 93                  | 7,716,108              | yellow          |
| LH143_maintainer | SRX243205  | 91,252,464 | 100             | 89,319,649    | 97                  | 71,605,165             | yellow          |
| LH145            | SRX243206  | 36,384,998 | 100             | 34,840,611    | 95                  | 26,403,051             | yellow          |
| LH149            | SRX243207  | 60,255,720 | 100             | 58,806,813    | 96                  | 41,561,356             | yellow          |
| LH38             | SRX243208  | 26,860,492 | 100             | 25,961,644    | 96                  | 20,157,364             | yellow          |
| LH39             | SRX243209  | 27,459,114 | 100             | 26,641,258    | 96                  | 20,795,902             | yellow          |
| LH59             | SRX243210  | 12,681,668 | 100             | 12,271,583    | 96                  | 9,846,179              | yellow          |
| LH60             | SRX243211  | 10,461,970 | 100             | 9,960,367     | 94                  | 7,453,481              | yellow          |
| LH61             | SRX243212  | 17,766,902 | 100             | 17,301,362    | 96                  | 13,852,288             | yellow          |
| LH82             | SRX243213  | 26,776,920 | 100             | 26,054,063    | 96                  | 20,610,714             | yellow          |
| LH93             | SRX243214  | 22,996,532 | 100             | 22,293,340    | 96                  | 17,788,189             | yellow          |
| LP5              | SRX243215  | 9,935,180  | 100             | 9,189,016     | 92                  | 7,603,271              | yellow          |
| M14              | SRX243216  | 13,005,832 | 100             | 12,397,721    | 96                  | 9,463,830              | yellow          |
| M162W            | SRX243217  | 19,692,202 | 100             | 19,232,505    | 97                  | 15,499,548             | white           |
| M37W             | SRX243218  | 18,823,804 | 100             | 17,700,042    | 95                  | 13,619,885             | white           |

| Name        | Experiment | Raw Reads   | Raw Length (bp) | Trimmed Reads | Trimmed Length (bp) | Uniquely Aligned Reads | Endosperm Color |
|-------------|------------|-------------|-----------------|---------------|---------------------|------------------------|-----------------|
| MEF156-55-2 | SRX243219  | 17,255,262  | 100             | 16,884,226    | 97                  | 13,341,805             | yellow          |
| Mo15W       | SRX243220  | 17,370,202  | 100             | 16,936,716    | 96                  | 13,578,627             |                 |
| Mo17        | SRX243221  | 423,104,568 | 100             | 405,149,825   | 96                  | 318,905,968            | yellow          |
| Mo23W       | SRX243222  | 44,269,526  | 100             | 41,634,348    | 93                  | 32,278,977             | white           |
| Mo24W       | SRX243223  | 20,777,914  | 100             | 20,303,790    | 97                  | 16,198,577             |                 |
| Mo28W       | SRX243224  | 16,437,646  | 100             | 16,087,999    | 96                  | 13,108,024             | white           |
| Mo3         | SRX243225  | 16,384,414  | 100             | 16,093,094    | 97                  | 13,016,405             |                 |
| Mo30W       | SRX243226  | 30,426,548  | 100             | 29,341,573    | 96                  | 23,609,704             | white           |
| Mo39        | SRX243227  | 53,300,974  | 100             | 52,075,256    | 96                  | 42,386,160             | yellow          |
| Mo44        | SRX243228  | 23,882,768  | 100             | 23,340,080    | 96                  | 18,658,662             | yellow          |
| Mo45        | SRX243229  | 27,264,386  | 100             | 25,357,753    | 94                  | 19,742,413             | yellow          |
| Mo47        | SRX243230  | 28,960,174  | 100             | 28,173,213    | 96                  | 22,262,261             | yellow          |
| Mo5         | SRX243231  | 45,099,828  | 100             | 42,082,068    | 94                  | 29,967,314             |                 |
| Mo7         | SRX243232  | 16,110,204  | 100             | 15,741,982    | 97                  | 12,528,659             |                 |
| MoG         | SRX243233  | 16,268,384  | 100             | 15,493,073    | 96                  | 11,735,108             | yellow          |
| Mp339       | SRX243234  | 28,567,862  | 100             | 27,673,281    | 96                  | 21,753,532             | white           |
| MS106       | SRX243235  | 27,265,904  | 100             | 24,321,133    | 93                  | 17,937,421             | yellow          |
| MS116       | SRX243236  | 21,496,828  | 100             | 20,724,608    | 95                  | 16,315,345             | yellow          |
| MS12        | SRX243237  | 18,573,112  | 100             | 18,119,776    | 96                  | 14,347,829             | yellow          |
| MS132       | SRX243238  | 14,831,286  | 100             | 14,440,464    | 96                  | 11,172,108             | yellow          |
| MS142       | SRX243239  | 14,863,610  | 100             | 13,952,379    | 92                  | 10,169,717             | yellow          |
| MS153       | SRX243240  | 14,674,068  | 100             | 14,348,304    | 96                  | 11,505,301             | yellow          |
| MS211       | SRX243241  | 22,647,994  | 100             | 22,000,735    | 95                  | 17,493,218             | yellow          |
| MS221       | SRX243242  | 22,966,398  | 100             | 22,362,206    | 97                  | 17,801,498             | yellow          |
| MS222       | SRX243243  | 12,283,238  | 100             | 11,312,470    | 92                  | 9,118,957              | yellow          |
| MS223       | SRX243244  | 17,503,782  | 100             | 15,807,520    | 93                  | 11,743,835             | yellow          |
| MS224       | SRX243245  | 13,539,670  | 100             | 13,219,640    | 97                  | 10,621,143             | yellow          |
| MS225       | SRX243246  | 28,165,858  | 100             | 27,507,620    | 96                  | 21,616,802             | yellow          |
| MS226       | SRX243247  | 23,926,722  | 100             | 23,356,049    | 96                  | 18,985,942             | yellow          |
| MS24A       | SRX243248  | 10,981,916  | 100             | 10,729,922    | 96                  | 8,633,806              | yellow          |
| MS67        | SRX243249  | 20,465,210  | 100             | 20,009,102    | 96                  | 16,267,016             | yellow          |
| MS72        | SRX243250  | 17,512,454  | 100             | 17,086,443    | 95                  | 13,870,916             | yellow          |
| Mt42        | SRX243251  | 20,965,486  | 100             | 20,044,528    | 96                  | 15,455,257             | yellow          |
| N193        | SRX243252  | 25,583,528  | 100             | 24,941,373    | 95                  | 19,854,631             | yellow          |
| N197        | SRX243253  | 21,468,016  | 100             | 19,493,112    | 94                  | 14,060,975             | yellow          |
| N199        | SRX243254  | 35,545,602  | 100             | 34,710,017    | 97                  | 28,068,698             |                 |
| N209        | SRX243255  | 21,999,130  | 100             | 21,431,777    | 96                  | 17,639,920             | yellow          |
| N215        | SRX243256  | 23,304,186  | 100             | 22,755,048    | 96                  | 18,380,506             | yellow          |
| N216        | SRX243257  | 21,817,228  | 100             | 21,319,791    | 96                  | 16,809,914             | yellow          |
| N217        | SRX243258  | 26,222,518  | 100             | 25,551,848    | 95                  | 20,829,605             | yellow          |
| N218        | SRX243259  | 14,932,164  | 100             | 14,609,729    | 95                  | 12,261,986             | yellow          |



| Name    | Experiment | Raw Reads  | Raw Length (bp) | Trimmed Reads | Trimmed Length (bp) | Uniquely Aligned Reads | Endosperm Color |
|---------|------------|------------|-----------------|---------------|---------------------|------------------------|-----------------|
| N28     | SRX243260  | 14,952,116 | 100             | 14,365,945    | 96                  | 11,209,458             | yellow          |
| N28E    | SRX243261  | 14,525,162 | 100             | 13,971,779    | 96                  | 11,342,683             |                 |
| N28Ht   | SRX243262  | 25,170,276 | 100             | 24,376,508    | 96                  | 19,854,383             | yellow          |
| N501    | SRX243263  | 19,524,376 | 100             | 19,080,906    | 96                  | 15,707,855             | yellow          |
| N527    | SRX243264  | 42,952,878 | 100             | 41,954,083    | 96                  | 34,039,485             | yellow          |
| N534    | SRX243265  | 22,379,562 | 100             | 21,817,788    | 96                  | 17,774,715             | yellow          |
| N538    | SRX243266  | 13,016,262 | 100             | 12,692,966    | 96                  | 10,058,044             | yellow          |
| N542    | SRX243267  | 28,855,264 | 100             | 27,914,280    | 97                  | 21,715,167             | yellow          |
| N545    | SRX243268  | 21,630,780 | 100             | 21,231,789    | 97                  | 17,340,976             | yellow          |
| N6      | SRX243269  | 24,072,996 | 100             | 22,309,227    | 94                  | 17,271,317             | yellow          |
| N7A     | SRX243270  | 20,616,154 | 100             | 19,288,503    | 95                  | 15,194,839             | yellow          |
| NC13    | SRX243271  | 10,947,350 | 100             | 10,601,186    | 96                  | 8,358,522              | yellow          |
| NC222   | SRX243272  | 19,539,622 | 100             | 18,969,030    | 96                  | 15,305,523             | yellow          |
| NC230   | SRX243273  | 16,472,442 | 100             | 15,991,208    | 96                  | 12,485,980             | yellow          |
| NC232   | SRX243274  | 26,909,016 | 100             | 26,247,406    | 96                  | 20,937,406             | yellow          |
| NC236   | SRX243275  | 18,958,462 | 100             | 18,532,072    | 96                  | 14,657,428             | yellow          |
| NC250   | SRX243276  | 28,990,060 | 100             | 28,292,967    | 96                  | 22,827,465             | yellow          |
| NC264   | SRX243277  | 20,633,426 | 100             | 20,078,763    | 96                  | 16,167,108             | yellow          |
| NC298   | SRX243278  | 11,142,998 | 100             | 10,813,406    | 96                  | 8,719,631              |                 |
| NC318   | SRX243279  | 26,169,336 | 100             | 25,466,861    | 97                  | 20,105,769             | yellow          |
| NC340   | SRX243280  | 20,290,596 | 100             | 19,816,746    | 96                  | 15,726,595             | white           |
| NC342   | SRX243281  | 20,657,414 | 100             | 19,310,288    | 95                  | 14,668,004             | yellow          |
| NC344   | SRX243282  | 16,801,966 | 100             | 16,003,548    | 96                  | 12,107,026             | yellow          |
| NC356   | SRX243283  | 23,182,824 | 100             | 22,669,611    | 97                  | 17,779,512             |                 |
| NC358   | SRX243284  | 16,378,010 | 100             | 15,555,113    | 96                  | 11,827,155             | yellow          |
| NC412   | SRX243285  | 20,156,144 | 100             | 19,684,059    | 96                  | 15,124,229             |                 |
| NC472   | SRX243286  | 24,218,378 | 100             | 23,636,113    | 96                  | 19,482,139             |                 |
| ND1     | SRX243287  | 27,856,130 | 100             | 27,281,052    | 95                  | 22,024,840             | yellow          |
| ND101   | SRX243288  | 15,092,660 | 100             | 14,632,914    | 95                  | 11,524,968             |                 |
| ND167   | SRX243289  | 20,677,068 | 100             | 19,821,710    | 96                  | 15,764,368             | yellow          |
| ND230   | SRX243290  | 21,080,088 | 100             | 20,648,412    | 96                  | 16,418,255             | yellow          |
| ND245   | SRX243291  | 22,621,014 | 100             | 22,061,930    | 95                  | 17,753,729             | yellow          |
| ND246   | SRX243292  | 37,042,254 | 100             | 34,733,104    | 95                  | 27,244,458             | yellow          |
| ND247   | SRX243293  | 11,159,102 | 100             | 10,814,798    | 96                  | 8,616,034              | yellow          |
| ND251   | SRX243294  | 17,278,066 | 100             | 16,809,819    | 95                  | 13,657,975             | yellow          |
| ND260   | SRX243295  | 16,011,528 | 100             | 15,654,134    | 95                  | 12,463,804             | yellow          |
| ND262   | SRX243296  | 35,043,884 | 100             | 34,029,499    | 97                  | 27,101,316             | yellow          |
| ND265   | SRX243297  | 21,831,498 | 100             | 20,840,201    | 96                  | 16,125,383             |                 |
| ND283   | SRX243298  | 16,985,198 | 100             | 16,563,863    | 96                  | 13,002,014             | yellow          |
| NK740   | SRX243299  | 13,211,132 | 100             | 12,696,973    | 96                  | 9,850,352              |                 |
| NKH8431 | SRX243300  | 18,882,860 | 100             | 18,432,994    | 95                  | 15,238,514             |                 |

| Name              | Experiment | Raw Reads   | Raw Length (bp) | Trimmed Reads | Trimmed Length (bp) | Uniquely Aligned Reads | Endosperm Color |
|-------------------|------------|-------------|-----------------|---------------|---------------------|------------------------|-----------------|
| NKS8324           | SRX243301  | 20,992,188  | 100             | 20,172,003    | 95                  | 16,042,254             |                 |
| NO_380            | SRX243302  | 18,353,686  | 100             | 17,887,343    | 95                  | 14,375,106             |                 |
| NP87              | SRX243303  | 39,181,534  | 100             | 38,112,802    | 96                  | 30,323,579             |                 |
| NY_159_Nevah_Yaar | SRX243304  | 40,723,356  | 100             | 39,540,778    | 95                  | 32,023,799             |                 |
| NY6371            | SRX243305  | 32,266,768  | 100             | 30,356,636    | 95                  | 23,456,195             |                 |
| OC19              | SRX243306  | 14,670,530  | 100             | 14,046,004    | 96                  | 11,183,755             | yellow          |
| OH33              | SRX243307  | 16,198,268  | 100             | 15,838,531    | 96                  | 12,590,035             | yellow          |
| Oh40B             | SRX243308  | 17,418,286  | 100             | 16,701,704    | 97                  | 12,910,037             | yellow          |
| Oh43              | SRX242933  | 153,949,626 | 50              | 152,276,584   | 50                  | 104,013,146            | yellow          |
| Oh7               | SRX243309  | 19,917,018  | 100             | 19,015,742    | 96                  | 15,011,846             | yellow          |
| Oh7B              | SRX243310  | 23,144,294  | 100             | 22,567,460    | 96                  | 18,299,747             |                 |
| Os420             | SRX243311  | 18,767,492  | 100             | 18,248,962    | 96                  | 14,609,795             | yellow          |
| Os426             | SRX243312  | 18,760,922  | 100             | 18,278,177    | 95                  | 14,528,381             | yellow          |
| P39               | SRX243313  | 14,846,640  | 100             | 14,481,354    | 97                  | 11,350,445             | yellow          |
| Pa392             | SRX243314  | 20,351,928  | 100             | 19,890,794    | 96                  | 16,369,072             | yellow          |
| Pa405             | SRX243315  | 27,125,298  | 100             | 26,081,730    | 95                  | 20,823,972             | yellow          |
| Pa468             | SRX243316  | 16,511,022  | 100             | 16,153,529    | 97                  | 12,640,429             | yellow          |
| Pa762             | SRX243317  | 17,774,018  | 100             | 16,689,694    | 95                  | 13,080,103             | yellow          |
| Pa778             | SRX243318  | 122,909,110 | 100             | 114,519,877   | 94                  | 89,841,913             | yellow          |
| Pa880             | SRX243319  | 22,079,778  | 100             | 21,571,119    | 97                  | 17,489,963             | yellow          |
| Pa891             | SRX243320  | 14,202,060  | 100             | 13,781,537    | 96                  | 10,688,041             | yellow          |
| PHB09             | SRX243321  | 19,988,480  | 100             | 19,538,275    | 96                  | 16,132,634             |                 |
| PHG29             | SRX243322  | 16,679,912  | 100             | 16,186,247    | 98                  | 12,879,253             | yellow          |
| PHG35             | SRX243323  | 27,217,860  | 100             | 26,581,975    | 95                  | 21,618,675             | yellow          |
| PHG39             | SRX243324  | 17,994,000  | 100             | 17,565,794    | 96                  | 13,874,174             | yellow          |
| PHG47             | SRX243325  | 16,034,368  | 100             | 15,637,676    | 97                  | 12,402,706             | yellow          |
| PHG50             | SRX243326  | 16,605,588  | 100             | 16,262,805    | 97                  | 12,855,667             | yellow          |
| PHG72             | SRX243327  | 33,097,364  | 100             | 32,360,530    | 96                  | 26,575,847             | yellow          |
| PHG80             | SRX243328  | 26,789,892  | 100             | 26,146,114    | 96                  | 21,323,737             |                 |
| PHJ40             | SRX243329  | 14,986,578  | 100             | 13,488,841    | 94                  | 10,108,105             | yellow          |
| PHK76             | SRX243330  | 18,840,524  | 100             | 18,294,123    | 96                  | 14,244,663             |                 |
| PHN11             | SRX243331  | 16,523,276  | 100             | 15,828,299    | 96                  | 12,336,403             | yellow          |
| PHR36             | SRX243332  | 18,173,904  | 100             | 17,664,926    | 95                  | 14,218,324             | white           |
| PHT55             | SRX243333  | 16,179,898  | 100             | 15,769,671    | 96                  | 12,431,860             | yellow          |
| PHT77             | SRX243334  | 16,354,664  | 100             | 15,906,634    | 96                  | 12,572,686             | yellow          |
| PHV63             | SRX243335  | 16,962,962  | 100             | 16,617,404    | 97                  | 13,552,278             | white           |
| PHW17             | SRX243336  | 39,051,520  | 100             | 37,707,503    | 96                  | 31,005,589             | white           |
| PHZ51             | SRX243337  | 21,097,802  | 100             | 20,291,510    | 95                  | 15,854,430             | yellow          |
| R101              | SRX243338  | 21,368,414  | 100             | 20,905,049    | 96                  | 16,833,354             | yellow          |
| R113              | SRX243339  | 21,806,256  | 100             | 21,282,760    | 96                  | 17,318,312             | yellow          |
| R134              | SRX243340  | 31,301,248  | 100             | 30,603,610    | 96                  | 24,912,304             | yellow          |

| Name                 | Experiment | Raw Reads  | Raw Length (bp) | Trimmed Reads | Trimmed Length (bp) | Uniquely Aligned Reads | Endosperm Color |
|----------------------|------------|------------|-----------------|---------------|---------------------|------------------------|-----------------|
| R168                 | SRX243341  | 18,194,224 | 100             | 17,712,839    | 97                  | 13,930,771             | yellow          |
| R177                 | SRX243342  | 19,660,696 | 100             | 19,171,635    | 96                  | 15,201,827             | yellow          |
| R181B                | SRX243343  | 14,667,890 | 100             | 14,242,821    | 96                  | 11,273,891             | yellow          |
| R197                 | SRX243344  | 16,136,306 | 100             | 15,699,062    | 97                  | 12,406,927             | yellow          |
| R225                 | SRX243345  | 19,896,148 | 100             | 19,501,472    | 97                  | 15,797,391             |                 |
| R226                 | SRX243346  | 11,150,330 | 100             | 10,894,334    | 97                  | 8,566,130              |                 |
| R227                 | SRX243347  | 18,050,616 | 100             | 17,569,607    | 95                  | 14,559,587             |                 |
| R229                 | SRX243348  | 22,799,462 | 100             | 22,323,308    | 97                  | 18,891,766             | yellow          |
| R30                  | SRX243349  | 19,607,286 | 100             | 19,125,756    | 96                  | 15,045,280             | white           |
| R4                   | SRX243350  | 15,715,192 | 100             | 14,689,396    | 96                  | 11,141,867             | yellow          |
| R53                  | SRX243351  | 19,073,796 | 100             | 18,510,210    | 96                  | 14,808,464             | yellow          |
| R71                  | SRX243352  | 8,188,664  | 100             | 7,953,720     | 96                  | 6,371,577              |                 |
| R78                  | SRX243353  | 17,892,902 | 100             | 16,920,623    | 95                  | 13,152,564             | yellow          |
| S_56                 | SRX243354  | 32,924,030 | 100             | 32,251,906    | 97                  | 25,707,634             |                 |
| SD101                | SRX243355  | 17,510,800 | 100             | 17,081,669    | 96                  | 13,826,743             | yellow          |
| SD102                | SRX243356  | 24,790,336 | 100             | 23,666,139    | 95                  | 18,393,451             | yellow          |
| SD107                | SRX243357  | 11,344,434 | 100             | 11,014,816    | 96                  | 8,835,449              |                 |
| SD15                 | SRX243358  | 22,316,686 | 100             | 21,501,768    | 97                  | 17,152,167             | yellow          |
| SD40                 | SRX243359  | 19,235,452 | 100             | 18,561,498    | 97                  | 14,835,496             | yellow          |
| SD42                 | SRX243360  | 16,684,960 | 100             | 16,193,849    | 96                  | 13,005,457             |                 |
| SD44                 | SRX243361  | 17,814,422 | 100             | 17,403,650    | 97                  | 13,863,095             | yellow          |
| SG_30A               | SRX243362  | 18,416,184 | 100             | 17,329,544    | 95                  | 13,446,734             | yellow          |
| Sg1533               | SRX243363  | 34,010,034 | 100             | 32,298,921    | 95                  | 23,875,098             |                 |
| Sg18                 | SRX243364  | 30,765,452 | 100             | 29,252,346    | 96                  | 23,203,604             | yellow          |
| T141                 | SRX243365  | 21,225,756 | 100             | 20,720,538    | 96                  | 16,505,681             |                 |
| T146                 | SRX243366  | 23,747,826 | 100             | 22,784,852    | 96                  | 17,693,979             |                 |
| T232                 | SRX243367  | 20,423,044 | 100             | 19,962,614    | 97                  | 16,371,992             | yellow          |
| T234                 | SRX243368  | 16,980,546 | 100             | 16,659,049    | 97                  | 13,186,942             | yellow          |
| T242                 | SRX243369  | 39,717,934 | 100             | 38,507,080    | 97                  | 30,756,981             |                 |
| T9                   | SRX243370  | 25,685,584 | 100             | 24,851,156    | 96                  | 19,898,500             |                 |
| Tr                   | SRX243371  | 19,448,170 | 100             | 18,984,576    | 96                  | 15,147,215             | yellow          |
| Tx303                | SRX243372  | 20,166,984 | 100             | 19,483,131    | 96                  | 15,396,105             | yellow          |
| TZU-CHIAO-HSI-WU_105 | SRX243373  | 20,103,584 | 100             | 19,377,127    | 96                  | 15,069,056             |                 |
| U_123                | SRX243374  | 14,449,710 | 100             | 13,825,831    | 96                  | 10,729,741             |                 |
| U267Y                | SRX243375  | 23,509,072 | 100             | 22,903,684    | 97                  | 18,375,143             | yellow          |
| Va102                | SRX243376  | 16,312,280 | 100             | 15,878,289    | 97                  | 12,451,864             | yellow          |
| Va14                 | SRX243377  | 14,844,966 | 100             | 14,468,789    | 97                  | 11,739,642             | yellow          |
| Va38                 | SRX243378  | 24,709,252 | 100             | 24,008,458    | 96                  | 19,032,474             |                 |
| Va52                 | SRX243379  | 16,401,656 | 100             | 15,979,147    | 96                  | 12,714,450             |                 |
| Va85                 | SRX243380  | 12,956,560 | 100             | 12,433,820    | 96                  | 9,558,657              | yellow          |
| Va99                 | SRX243381  | 19,623,090 | 100             | 19,058,777    | 96                  | 15,050,539             | yellow          |

| Name   | Experiment | Raw Reads  | Raw Length (bp) | Trimmed Reads | Trimmed Length (bp) | Uniquely Aligned Reads | Endosperm Color |
|--------|------------|------------|-----------------|---------------|---------------------|------------------------|-----------------|
| VaW6   | SRX243382  | 25,685,590 | 100             | 24,745,262    | 96                  | 19,783,124             | yellow          |
| W_7151 | SRX243383  | 12,230,808 | 100             | 11,931,010    | 97                  | 9,492,586              | yellow          |
| W117Ht | SRX243384  | 21,187,400 | 100             | 20,391,856    | 97                  | 15,799,554             | yellow          |
| W153R  | SRX243385  | 17,162,528 | 100             | 16,788,967    | 97                  | 13,756,651             | yellow          |
| W182BN | SRX243386  | 26,155,852 | 100             | 25,549,084    | 97                  | 20,434,763             | yellow          |
| W22    | SRX243387  | 18,135,112 | 100             | 17,194,675    | 96                  | 13,377,221             | yellow          |
| W23    | SRX243388  | 18,738,772 | 100             | 17,548,137    | 96                  | 13,425,503             | yellow          |
| W24    | SRX243389  | 24,226,692 | 100             | 23,650,036    | 97                  | 19,243,296             | yellow          |
| W32    | SRX243390  | 23,862,044 | 100             | 23,244,760    | 96                  | 18,822,802             | yellow          |
| W37A   | SRX243391  | 26,447,194 | 100             | 25,496,290    | 96                  | 19,699,071             | yellow          |
| W552   | SRX243392  | 25,878,658 | 100             | 25,189,520    | 96                  | 20,272,148             | yellow          |
| W59E   | SRX243393  | 21,452,024 | 100             | 21,030,625    | 97                  | 16,800,354             | yellow          |
| W601S  | SRX243394  | 19,310,090 | 100             | 18,575,150    | 97                  | 14,412,127             |                 |
| W603S  | SRX243395  | 54,405,164 | 100             | 51,718,819    | 95                  | 40,127,164             |                 |
| W604S  | SRX243396  | 20,040,578 | 100             | 19,532,700    | 97                  | 15,703,182             | yellow          |
| W605S  | SRX243397  | 58,012,122 | 100             | 56,659,231    | 97                  | 44,580,234             | yellow          |
| W606S  | SRX243398  | 21,532,304 | 100             | 20,582,667    | 96                  | 16,458,360             |                 |
| W607S  | SRX243399  | 22,576,380 | 100             | 22,125,570    | 97                  | 17,713,679             |                 |
| W608S  | SRX243400  | 32,228,122 | 100             | 31,131,173    | 96                  | 24,911,614             |                 |
| W609S  | SRX243401  | 14,241,712 | 100             | 13,881,362    | 97                  | 11,050,111             |                 |
| W610S  | SRX243402  | 24,922,080 | 100             | 24,306,220    | 96                  | 19,984,434             |                 |
| W611S  | SRX243403  | 36,432,166 | 100             | 35,406,751    | 97                  | 27,782,223             |                 |
| W612S  | SRX243404  | 9,780,516  | 100             | 9,438,785     | 96                  | 7,409,098              |                 |
| W64A   | SRX243405  | 20,183,626 | 100             | 19,268,486    | 97                  | 15,071,157             | yellow          |
| W701BC | SRX243406  | 16,780,446 | 100             | 16,306,972    | 96                  | 12,993,827             |                 |
| W703   | SRX243407  | 9,657,608  | 100             | 9,374,225     | 97                  | 7,314,152              | yellow          |
| W802G  | SRX243408  | 19,676,058 | 100             | 19,048,019    | 96                  | 15,283,492             | white           |
| W803G  | SRX243409  | 21,694,494 | 100             | 21,193,998    | 96                  | 17,226,607             | yellow          |
| W809G  | SRX243410  | 12,740,278 | 100             | 12,198,684    | 96                  | 9,896,891              | yellow          |
| W810G  | SRX243411  | 28,488,940 | 100             | 27,889,769    | 97                  | 22,471,196             | yellow          |
| W811G  | SRX243412  | 25,194,950 | 100             | 24,697,789    | 97                  | 20,725,541             | yellow          |
| W812G  | SRX243413  | 30,432,974 | 100             | 29,654,637    | 97                  | 24,089,527             | yellow          |
| W813G  | SRX243414  | 19,051,986 | 100             | 18,622,053    | 96                  | 15,257,693             | yellow          |
| W814G  | SRX243415  | 21,902,840 | 100             | 21,375,069    | 96                  | 17,435,746             | yellow          |
| W815G  | SRX243416  | 17,473,424 | 100             | 17,010,709    | 97                  | 13,463,566             |                 |
| W816G  | SRX243417  | 19,070,126 | 100             | 18,341,053    | 96                  | 14,479,341             | yellow          |
| W817G  | SRX243418  | 14,696,452 | 100             | 14,335,172    | 96                  | 11,471,802             | yellow          |
| W818G  | SRX243419  | 23,292,578 | 100             | 22,821,568    | 97                  | 18,961,940             |                 |
| W819G  | SRX243420  | 23,497,822 | 100             | 22,912,370    | 96                  | 19,179,503             | yellow          |
| W820G  | SRX243421  | 23,477,036 | 100             | 22,948,908    | 97                  | 19,044,454             | yellow          |
| W821G  | SRX243422  | 34,838,438 | 100             | 34,064,605    | 97                  | 26,673,666             | yellow          |

| Name        | Experiment | Raw Reads  | Raw Length (bp) | Trimmed Reads | Trimmed Length (bp) | Uniquely Aligned Reads | Endosperm Color |
|-------------|------------|------------|-----------------|---------------|---------------------|------------------------|-----------------|
| W85         | SRX243423  | 23,100,570 | 100             | 22,647,333    | 97                  | 18,275,706             |                 |
| W9          | SRX243424  | 17,887,614 | 100             | 17,451,668    | 97                  | 13,879,754             | yellow          |
| WD          | SRX243425  | 25,661,530 | 100             | 24,094,688    | 95                  | 18,454,622             | yellow          |
| WR3         | SRX243426  | 9,345,750  | 100             | 9,149,437     | 97                  | 7,314,991              | yellow          |
| WU-TAN-TZAO | SRX243427  | 27,905,224 | 100             | 27,191,399    | 96                  | 21,546,256             |                 |
| WXB6        | SRX243428  | 28,369,512 | 100             | 26,731,384    | 95                  | 20,765,371             | yellow          |
| YANG        | SRX243429  | 43,317,500 | 100             | 42,175,452    | 97                  | 33,667,263             |                 |
| YE_4        | SRX243430  | 11,800,266 | 100             | 11,491,635    | 96                  | 9,292,756              |                 |
| YE-CHI-HUNG | SRX243431  | 22,905,440 | 100             | 22,360,636    | 97                  | 17,572,472             |                 |
| yellow_3-4  | SRX243432  | 18,411,860 | 100             | 18,038,667    | 97                  | 14,446,223             |                 |
| YING-55     | SRX243433  | 40,187,372 | 100             | 39,230,468    | 97                  | 31,092,851             |                 |
| YONG_28     | SRX243434  | 34,661,122 | 100             | 33,919,234    | 97                  | 26,932,001             | white           |
| Yu796_NS    | SRX243435  | 16,050,986 | 100             | 15,686,027    | 97                  | 12,354,447             | yellow          |

**Supplemental Table S4.** Numbers of genes expressed in seven tissues of a maize diversity panel and the frequencies of yellow and white endosperm phenotypes in subsets of this panel.

| <b>Maize Tissue</b> | <b>Expressed Genes</b> | <b>Samples</b> | <b>Endosperm<br/>White</b> | <b>Endosperm<br/>Yellow</b> |
|---------------------|------------------------|----------------|----------------------------|-----------------------------|
| Root                | 24,517                 | 273            | 55                         | 156                         |
| Shoot               | 24,362                 | 278            | 61                         | 159                         |
| Kernels             | 23,855                 | 230            | 41                         | 147                         |
| Leaf Base           | 24,020                 | 263            | 59                         | 154                         |
| Leaf Tip            | 24,248                 | 265            | 60                         | 156                         |
| Leaf-Day            | 24,054                 | 203            | 48                         | 112                         |
| Leaf-Night          | 23,996                 | 261            | 50                         | 161                         |

Note: Some of samples have no endosperm phenotype available.

**Supplemental Table S5.** DTA-associated maize genes identified via TWAS using expression data from seven tissues.

| ID                   | Chr. | Start     | End       | P-value  | Samples | Tissue     | Know Gene       |
|----------------------|------|-----------|-----------|----------|---------|------------|-----------------|
| <i>GRMZM2G171650</i> | 3    | 159022119 | 159050063 | 2.44E-06 | 248     | Root       | <i>ZmMADS69</i> |
| <i>GRMZM2G117012</i> | 5    | 69463587  | 69464815  | 8.18E-05 | 248     | Root       |                 |
| <i>GRMZM2G430526</i> | 5    | 162738444 | 162743510 | 4.14E-05 | 248     | Root       |                 |
| <i>GRMZM2G457415</i> | 9    | 34843533  | 34862015  | 4.71E-05 | 248     | Root       |                 |
| <i>GRMZM2G317262</i> | 9    | 133838161 | 133839932 | 4.59E-05 | 248     | Root       |                 |
| <i>GRMZM2G089421</i> | 9    | 152399689 | 152401927 | 2.78E-05 | 248     | Root       |                 |
| <i>GRMZM2G419024</i> | 1    | 201439240 | 201445286 | 9.01E-05 | 258     | Shoot      |                 |
| <i>GRMZM2G171650</i> | 3    | 159022119 | 159050063 | 2.27E-05 | 258     | Shoot      | <i>ZmMADS69</i> |
| <i>GRMZM2G338693</i> | 5    | 17212985  | 17288687  | 8.48E-05 | 258     | Shoot      |                 |
| <i>GRMZM2G430526</i> | 5    | 162738444 | 162743510 | 5.42E-05 | 258     | Shoot      |                 |
| <i>GRMZM2G116517</i> | 7    | 116399077 | 116402985 | 8.99E-05 | 258     | Shoot      |                 |
| <i>GRMZM2G700665</i> | 8    | 131576889 | 131580316 | 6.02E-05 | 258     | Shoot      | <i>ZmRap2.7</i> |
| <i>GRMZM2G171650</i> | 3    | 159022119 | 159050063 | 2.83E-06 | 220     | Kernels    | <i>ZmMADS69</i> |
| <i>GRMZM2G026881</i> | 5    | 50479549  | 50481319  | 9.08E-05 | 220     | Kernels    |                 |
| <i>GRMZM2G410152</i> | 9    | 51770330  | 51771142  | 1.27E-06 | 220     | Kernels    |                 |
| <i>GRMZM2G097277</i> | 2    | 218318696 | 218325243 | 6.11E-05 | 251     | Leaf Base  |                 |
| <i>GRMZM2G430526</i> | 5    | 162738444 | 162743510 | 4.99E-05 | 251     | Leaf Base  |                 |
| <i>GRMZM2G088088</i> | 8    | 82956568  | 82961691  | 4.69E-05 | 251     | Leaf Base  |                 |
| <i>GRMZM2G007426</i> | 9    | 124845545 | 124847059 | 7.70E-05 | 251     | Leaf Base  |                 |
| <i>GRMZM2G052206</i> | 1    | 59594490  | 59600500  | 5.99E-05 | 253     | Leaf Tip   |                 |
| <i>GRMZM2G132000</i> | 2    | 145653086 | 145656777 | 7.13E-05 | 253     | Leaf Tip   |                 |
| <i>GRMZM2G157631</i> | 8    | 121588442 | 121592758 | 7.14E-05 | 253     | Leaf Tip   |                 |
| <i>GRMZM2G179264</i> | 8    | 123030387 | 123032175 | 3.34E-06 | 253     | Leaf Tip   | <i>ZCN8</i>     |
| <i>GRMZM2G700665</i> | 8    | 131576889 | 131580316 | 2.32E-05 | 253     | Leaf Tip   | <i>ZmRap2.7</i> |
| <i>GRMZM2G125494</i> | 2    | 15582030  | 15592514  | 6.21E-05 | 191     | Leaf-Day   |                 |
| <i>GRMZM2G103666</i> | 3    | 197706353 | 197708239 | 1.75E-05 | 191     | Leaf-Day   | <i>ZCN12</i>    |
| <i>GRMZM2G305154</i> | 3    | 134745438 | 134748098 | 3.25E-05 | 248     | Leaf-Night |                 |
| <i>GRMZM2G020920</i> | 4    | 49111485  | 49155166  | 1.22E-05 | 248     | Leaf-Night |                 |
| <i>GRMZM2G427369</i> | 5    | 210013736 | 210020221 | 3.85E-05 | 248     | Leaf-Night |                 |

**Supplemental Table S6.** Carotenoid-associated maize genes identified via TWAS using expression data from maize seedling.

| <b>ID</b>            | <b>Chr.</b> | <b>Start</b> | <b>End</b> | <b>P-value</b> | <b>Samples</b> | <b>Trait</b>                     | <b>Annotation</b>                                                                                       |
|----------------------|-------------|--------------|------------|----------------|----------------|----------------------------------|---------------------------------------------------------------------------------------------------------|
| <i>GRMZM2G087207</i> | 1           | 4011889      | 4016576    | 4.76E-05       | 104            | Phytofluene                      | Hydroxymethylglutaryl-CoA synthase / HMG-CoA synthase / 3-hydroxy-3-methylglutaryl coenzyme A synthase. |
| <i>GRMZM2G013430</i> | 1           | 24049836     | 24051294   | 6.34E-05       | 104            | ζ-Carotene                       | Serine acetyltransferase.                                                                               |
| <i>GRMZM2G143202</i> | 1           | 86848122     | 86858514   | 5.03E-06       | 104            | Zeinoxanthin/Lutein              | Cytochrome P450 superfamily protein.                                                                    |
| <i>GRMZM5G886989</i> | 2           | 65370210     | 65379554   | 9.61E-05       | 105            | Provitamin A/Total Carotenoids   | Transport protein particle (TRAPP) component.                                                           |
| <i>GRMZM2G013357</i> | 2           | 86876029     | 86881956   | 3.30E-05       | 105            | β-Cryptoxanthin/<br>Zeaxanthin   | Cytochrome P450, family 81, subfamily D, polypeptide 5.                                                 |
| <i>GRMZM2G013357</i> | 2           | 86876029     | 86881956   | 5.97E-05       | 104            | Provitamin A                     | Cytochrome P450, family 81, subfamily D, polypeptide 5.                                                 |
| <i>GRMZM2G131912</i> | 2           | 110205319    | 110210845  | 7.08E-05       | 105            | β-Cryptoxanthin<br>/Zeaxanthin   | Pectin lyase-like superfamily protein.                                                                  |
| <i>GRMZM2G047292</i> | 2           | 139818315    | 139820635  | 7.83E-05       | 105            | α-Carotene                       | Seed imbibition 2.                                                                                      |
| <i>GRMZM2G178533</i> | 3           | 179689569    | 179692060  | 8.91E-05       | 104            | Zeinoxanthin/Lutein              | NAD(P)-linked oxidoreductase superfamily protein.                                                       |
| <i>GRMZM2G085573</i> | 4           | 60197640     | 60203583   | 8.64E-05       | 104            | ζ-Carotene                       | Calcium-binding EF-hand family protein.                                                                 |
| <i>GRMZM2G145718</i> | 6           | 59028977     | 59033586   | 5.77E-05       | 105            | Lutein                           |                                                                                                         |
| <i>GRMZM2G145718</i> | 6           | 59028977     | 59033586   | 7.16E-05       | 105            | Total a-Xanthophylls             |                                                                                                         |
| <i>GRMZM2G037882</i> | 7           | 29406258     | 29409357   | 5.94E-05       | 102            | Total b-Xanthophylls             | F-box/RNI-like/FBD-like domains-containing protein.                                                     |
| <i>GRMZM2G037882</i> | 7           | 29406258     | 29409357   | 8.90E-05       | 102            | Zeaxanthin                       | F-box/RNI-like/FBD-like domains-containing protein.                                                     |
| <i>GRMZM5G822440</i> | 7           | 157496168    | 157498257  | 4.35E-05       | 104            | Acyclic and Monocyclic Carotenes | ARM repeat superfamily protein.                                                                         |
| <i>GRMZM2G406603</i> | 9           | 88263061     | 88268115   | 5.91E-05       | 105            | Total Carotenoids                | Fatty acyl-ACP thioesterases B.                                                                         |
| <i>GRMZM2G393742</i> | 10          | 83551464     | 83557118   | 3.13E-05       | 105            | α-Carotene                       | SNF2 domain-containing protein / helicase domain-containing protein.                                    |
| <i>GRMZM2G029039</i> | 10          | 142218302    | 142221256  | 7.23E-05       | 102            | β-Xanthophylls/α-Xanthophylls    | Galactose oxidase/kelch repeat superfamily protein.                                                     |
| <i>GRMZM2G117531</i> | 10          | 144548085    | 144553572  | 8.77E-05       | 105            | Total Carotenoids                | Alpha/beta-Hydrolases superfamily protein.                                                              |



**Supplemental Table S7. Data used.**

| <b>Species</b>     | <b>Genotype<br/>(No. Samples)</b>                 | <b>Expression<br/>(No. Samples)</b> | <b>Phenotypes</b>                    | <b>Subject Samples*</b> |
|--------------------|---------------------------------------------------|-------------------------------------|--------------------------------------|-------------------------|
| <i>Arabidopsis</i> | Re-Sequencing of<br>1,135 accessions <sup>a</sup> | Rosettes leaves (727) <sup>b</sup>  | Flowering time traits <sup>a,c</sup> | 613-690                 |
|                    |                                                   |                                     | Leaf number traits <sup>c</sup>      | 574-604                 |
| Soybean            | Leaves (N=102) <sup>d</sup>                       |                                     | Pubescence color <sup>e</sup>        | 75                      |
| Maize              | -                                                 | Whole seedlings (503) <sup>f</sup>  | Carotenoid traits <sup>g</sup>       | 102-105                 |
|                    | -                                                 | 7 Tissues (~255) <sup>h</sup>       | Endosperm color <sup>e</sup>         | 203-278                 |
|                    |                                                   |                                     | Days to anthesis <sup>i</sup>        | 191-258                 |

\*, Subject Samples, samples having phenotypes and expression data were used for subsequent association analyses; <sup>a</sup>, Alonso-Blanco et al., 2016; <sup>b</sup>, Kawakatsu et al., 2016; <sup>c</sup>, Grimm et al., 2017; <sup>d</sup>, El Baidouri et al., 2018 and SRP108748; <sup>e</sup>, U.S. National Plant Germplasm System; <sup>f</sup>, Hirsch et al., 2014; <sup>g</sup>, Owens et al., 2014; <sup>h</sup>, Kremling et al., 2018; <sup>i</sup>, Peiffer et al., 2014.
